# Supplementary material for: Under-Representation of Racial Groups in Genomics Studies of Gastroenteropancreatic Neuroendocrine Neoplasms
Source: Cancer Res Commun. 2022 Oct 12;2(10):1162–73. doi: 10.1158/2767-9764.CRC-22-0093 (PMC10035394; doi:10.1158/2767-9764.CRC-22-0093)
Supplement: Supplementary Data S1-S3 — AACR Genie Comparisons (SD.1), STRING Interactions (SD.2), GO Enrichment of STRING data (SD.3) [file crc-22-0093-s04.xlsx]

## Sheet: S. Data 1- GENIE Comparisons
Gene	Cytoband	(A) Black Patients	(B) White Patients	Log Ratio	p-Value	q-Value	Enriched in
TP53BP1	15q15.3	2 (12.50%)	0 (0.00%)	>10	0.005265	0.349	(A) Black Patients
CHEK2	22q12.1	2 (8.33%)	0 (0.00%)	>10	0.006496	0.349	(A) Black Patients
CRKL	22q11.21	2 (8.33%)	0 (0.00%)	>10	0.006496	0.349	(A) Black Patients
MAPK1	22q11.22	2 (8.33%)	0 (0.00%)	>10	0.006496	0.349	(A) Black Patients
NF2	22q12.2	2 (8.33%)	0 (0.00%)	>10	0.006496	0.349	(A) Black Patients
SMARCB1	22q11.23|22q11	2 (8.33%)	0 (0.00%)	>10	0.006496	0.349	(A) Black Patients
KMT2D	12q13.12	3 (12.50%)	4 (1.49%)	3.07	0.0138	0.634	(A) Black Patients
MUTYH	1p34.1	2 (8.33%)	1 (0.37%)	4.48	0.0185	0.745	(A) Black Patients
MEN1	11q13.1	4 (16.67%)	100 (37.31%)	-1.16	0.0313	0.952	(B) White Patients
EP300	22q13.2	2 (8.33%)	2 (0.75%)	3.48	0.0351	0.952	(A) Black Patients
TSC2	16p13.3	0 (0.00%)	32 (11.94%)	<-10	0.0545	0.952	(B) White Patients
ZNRF3	22q12.1	1 (25.00%)	0 (0.00%)	>10	0.0615	0.952	(A) Black Patients
DMC1	22q13.1	1 (25.00%)	0 (0.00%)	>10	0.0625	0.952	(A) Black Patients
ELANE	19p13.3	1 (25.00%)	0 (0.00%)	>10	0.0625	0.952	(A) Black Patients
PAXIP1	7q36.2	1 (25.00%)	0 (0.00%)	>10	0.0625	0.952	(A) Black Patients
XRCC6	22q13.2	1 (25.00%)	0 (0.00%)	>10	0.0625	0.952	(A) Black Patients
RHEB	7q36.1	1 (5.26%)	0 (0.00%)	>10	0.0722	0.952	(A) Black Patients
PNRC1	6q15	1 (6.25%)	0 (0.00%)	>10	0.0731	0.952	(A) Black Patients
PTP4A1	6q12	1 (8.33%)	0 (0.00%)	>10	0.08	0.952	(A) Black Patients
SESN3	11q21	1 (8.33%)	0 (0.00%)	>10	0.08	0.952	(A) Black Patients
ATRX	Xq21.1	0 (0.00%)	28 (10.45%)	<-10	0.08	0.952	(B) White Patients
EZH2	7q36.1	1 (4.17%)	0 (0.00%)	>10	0.0822	0.952	(A) Black Patients
NBN	8q21.3	1 (4.17%)	0 (0.00%)	>10	0.0822	0.952	(A) Black Patients
PRDM1	6q21	1 (4.17%)	0 (0.00%)	>10	0.0822	0.952	(A) Black Patients
PDCD1LG2	9p24.1	1 (4.35%)	0 (0.00%)	>10	0.0824	0.952	(A) Black Patients
KNSTRN	15q15.1	1 (7.69%)	0 (0.00%)	>10	0.085	0.952	(A) Black Patients
XRCC2	7q36.1	1 (5.26%)	0 (0.00%)	>10	0.0856	0.952	(A) Black Patients
MAP2K2	19p13.3	1 (4.76%)	0 (0.00%)	>10	0.089	0.952	(A) Black Patients
TRAF2	9q34.3	1 (7.14%)	0 (0.00%)	>10	0.0897	0.952	(A) Black Patients
SAMHD1	20q11.23	0 (0.00%)	1 (33.33%)	<-10	0.111	0.952	(B) White Patients
USP28	11q23.2	1 (25.00%)	1 (1.67%)	3.91	0.122	0.952	(A) Black Patients
B2M	15q21.1	1 (4.55%)	1 (0.38%)	3.59	0.148	0.952	(A) Black Patients
CRLF2	Xp22.33 and Yp11.2	1 (4.55%)	1 (0.38%)	3.59	0.148	0.952	(A) Black Patients
YAP1	11q22.1	1 (5.56%)	1 (0.47%)	3.56	0.151	0.952	(A) Black Patients
ERCC2	19q13.32	1 (4.35%)	1 (0.37%)	3.54	0.153	0.952	(A) Black Patients
PHOX2B	4p13	1 (4.35%)	1 (0.37%)	3.54	0.153	0.952	(A) Black Patients
ETV4	17q21.31	1 (10.00%)	1 (0.86%)	3.54	0.153	0.952	(A) Black Patients
PIK3C2B	1q32.1	1 (10.00%)	1 (0.86%)	3.54	0.153	0.952	(A) Black Patients
PBRM1	3p21.1	1 (4.35%)	1 (0.39%)	3.48	0.158	0.952	(A) Black Patients
AKT2	19q13.2	1 (4.17%)	1 (0.37%)	3.48	0.158	0.952	(A) Black Patients
BRIP1	17q23.2	1 (4.17%)	1 (0.37%)	3.48	0.158	0.952	(A) Black Patients
CD274	9p24.1	1 (4.17%)	1 (0.37%)	3.48	0.158	0.952	(A) Black Patients
FLCN	17p11.2	1 (4.17%)	1 (0.37%)	3.48	0.158	0.952	(A) Black Patients
GNA11	19p13.3	1 (4.17%)	1 (0.37%)	3.48	0.158	0.952	(A) Black Patients
JAK2	9p24.1	1 (4.17%)	1 (0.37%)	3.48	0.158	0.952	(A) Black Patients
MSH2	2p21-p16.3	1 (4.17%)	1 (0.37%)	3.48	0.158	0.952	(A) Black Patients
EPHA7	6q16.1	1 (5.56%)	1 (0.51%)	3.45	0.161	0.952	(A) Black Patients
SPRED1	15q14	1 (7.69%)	1 (0.71%)	3.43	0.163	0.952	(A) Black Patients
SMAD4	18q21.2	2 (8.33%)	7 (2.61%)	1.67	0.163	0.952	(A) Black Patients
DAXX	6p21.32	2 (10.00%)	47 (22.07%)	-1.14	0.164	0.952	(B) White Patients
ATR	3q23	1 (4.76%)	1 (0.47%)	3.36	0.17	0.952	(A) Black Patients
FOXL2	3q22.3	1 (4.76%)	1 (0.47%)	3.36	0.17	0.952	(A) Black Patients
RAD51	15q15.1	1 (4.76%)	1 (0.47%)	3.36	0.17	0.952	(A) Black Patients
RPTOR	17q25.3	1 (4.76%)	1 (0.47%)	3.36	0.17	0.952	(A) Black Patients
KMT2C	7q36.1	1 (6.67%)	1 (0.66%)	3.34	0.172	0.952	(A) Black Patients
ABCB11	2q31.1	1 (25.00%)	2 (3.33%)	2.91	0.179	0.952	(A) Black Patients
PGR	11q22.1	1 (8.33%)	2 (1.43%)	2.54	0.22	0.952	(A) Black Patients
ARID2	12q12	1 (4.35%)	2 (0.75%)	2.54	0.22	0.952	(A) Black Patients
TERT	5p15.33	1 (4.35%)	2 (0.75%)	2.54	0.22	0.952	(A) Black Patients
RAC2	22q13.1	1 (8.33%)	2 (1.45%)	2.52	0.223	0.952	(A) Black Patients
KDM5C	Xp11.22	1 (4.35%)	2 (0.78%)	2.48	0.227	0.952	(A) Black Patients
TCF3	19p13.3	1 (4.76%)	3 (1.18%)	2.02	0.273	0.952	(A) Black Patients
MGA	15q15.1	1 (5.88%)	3 (1.49%)	1.99	0.278	0.952	(A) Black Patients
RB1	13q14.2	2 (8.33%)	11 (4.10%)	1.02	0.29	0.952	(A) Black Patients
EWSR1	22q12.2	1 (9.09%)	3 (2.54%)	1.84	0.303	0.952	(A) Black Patients
ARID1B	6q25.3	1 (4.35%)	4 (1.50%)	1.54	0.34	0.952	(A) Black Patients
CDKN2C	1p32.3	1 (4.17%)	4 (1.49%)	1.48	0.351	0.952	(A) Black Patients
DNMT3A	2p23.3	1 (4.17%)	4 (1.49%)	1.48	0.351	0.952	(A) Black Patients
STK11	19p13.3	1 (4.17%)	4 (1.49%)	1.48	0.351	0.952	(A) Black Patients
TSC1	9q34.13	1 (4.17%)	4 (1.49%)	1.48	0.351	0.952	(A) Black Patients
CDKN1A	6p21.2	1 (4.17%)	5 (1.87%)	1.16	0.405	0.952	(A) Black Patients
SMARCA4	19p13.2	1 (4.17%)	5 (1.87%)	1.16	0.405	0.952	(A) Black Patients
PTPRD	9p24.1-p23	1 (5.56%)	5 (2.55%)	1.12	0.414	0.952	(A) Black Patients
TP53	17p13.1	2 (8.33%)	15 (5.60%)	0.57	0.416	0.952	(A) Black Patients
SETD2	3p21.31	2 (8.33%)	16 (5.97%)	0.48	0.447	0.952	(A) Black Patients
FLI1	11q24.3	0 (0.00%)	1 (50.00%)	<-10	0.5	0.952	(B) White Patients
BCOR	Xp11.4	1 (4.17%)	7 (2.61%)	0.67	0.501	0.952	(A) Black Patients
ARID1A	1p36.11	1 (4.17%)	17 (6.34%)	-0.61	0.553	0.952	(B) White Patients
ZNF703	8p11.23	0 (0.00%)	1 (20.00%)	<-10	0.556	0.952	(B) White Patients
CDKN2A	9p21.3	2 (8.33%)	27 (10.07%)	-0.27	0.565	0.952	(B) White Patients
PTEN	10q23.31	1 (4.17%)	16 (5.97%)	-0.52	0.584	0.952	(B) White Patients
CREBBP	16p13.3	0 (0.00%)	6 (2.24%)	<-10	0.595	0.952	(B) White Patients
MSH6	2p16.3	0 (0.00%)	6 (2.24%)	<-10	0.595	0.952	(B) White Patients
FLT4	5q35.3	0 (0.00%)	6 (2.25%)	<-10	0.606	0.952	(B) White Patients
APC	5q22.2	0 (0.00%)	5 (1.87%)	<-10	0.649	0.952	(B) White Patients
BRCA2	13q13.1	0 (0.00%)	5 (1.87%)	<-10	0.649	0.952	(B) White Patients
CDKN2B	9p21.3	2 (8.33%)	23 (8.58%)	-0.04	0.662	0.952	(B) White Patients
ATM	11q22.3	0 (0.00%)	4 (1.49%)	<-10	0.708	0.952	(B) White Patients
FGFR3	4p16.3	0 (0.00%)	4 (1.49%)	<-10	0.708	0.952	(B) White Patients
GATA3	10p14	0 (0.00%)	4 (1.49%)	<-10	0.708	0.952	(B) White Patients
MLH1	3p22.2	0 (0.00%)	4 (1.49%)	<-10	0.708	0.952	(B) White Patients
PLCG1	20q12	0 (0.00%)	1 (20.00%)	<-10	0.714	0.952	(B) White Patients
BMPR1A	10q23.2	0 (0.00%)	4 (1.51%)	<-10	0.726	0.952	(B) White Patients
SPEN	1p36.21-p36.13	0 (0.00%)	3 (1.94%)	<-10	0.73	0.952	(B) White Patients
PIK3CD	1p36.22	0 (0.00%)	3 (1.97%)	<-10	0.753	0.952	(B) White Patients
NSD2	4p16.3	0 (0.00%)	3 (1.48%)	<-10	0.753	0.952	(B) White Patients
MED12	Xq13.1	0 (0.00%)	3 (1.40%)	<-10	0.755	0.952	(B) White Patients
POLE	12q24.33	0 (0.00%)	3 (1.40%)	<-10	0.755	0.952	(B) White Patients
TRAF7	16p13.3	0 (0.00%)	3 (1.40%)	<-10	0.764	0.952	(B) White Patients
AURKB	17p13.1	0 (0.00%)	3 (1.12%)	<-10	0.772	0.952	(B) White Patients
BRCA1	17q21.31	0 (0.00%)	3 (1.12%)	<-10	0.772	0.952	(B) White Patients
CARD11	7p22.2	0 (0.00%)	3 (1.12%)	<-10	0.772	0.952	(B) White Patients
CDKN1B	12p13.1	0 (0.00%)	3 (1.12%)	<-10	0.772	0.952	(B) White Patients
IGF1R	15q26.3	0 (0.00%)	3 (1.12%)	<-10	0.772	0.952	(B) White Patients
KDM6A	Xp11.3	0 (0.00%)	3 (1.12%)	<-10	0.772	0.952	(B) White Patients
KMT2A	11q23.3	0 (0.00%)	3 (1.12%)	<-10	0.772	0.952	(B) White Patients
NF1	17q11.2	0 (0.00%)	3 (1.12%)	<-10	0.772	0.952	(B) White Patients
NOTCH1	9q34.3	0 (0.00%)	3 (1.12%)	<-10	0.772	0.952	(B) White Patients
PHC2	1p35.1	0 (0.00%)	3 (1.12%)	<-10	0.772	0.952	(B) White Patients
RET	10q11.21	0 (0.00%)	3 (1.12%)	<-10	0.772	0.952	(B) White Patients
VHL	3p25.3	0 (0.00%)	3 (1.12%)	<-10	0.772	0.952	(B) White Patients
GPS2	17p13.1	0 (0.00%)	3 (2.14%)	<-10	0.78	0.952	(B) White Patients
MYBL1	8q13.1	0 (0.00%)	3 (2.56%)	<-10	0.78	0.952	(B) White Patients
PRKDC	8q11.21	0 (0.00%)	3 (2.56%)	<-10	0.78	0.952	(B) White Patients
TCF7L2	10q25.2-q25.3	0 (0.00%)	3 (1.17%)	<-10	0.781	0.952	(B) White Patients
FUS	16p11.2	0 (0.00%)	3 (2.83%)	<-10	0.781	0.952	(B) White Patients
PPM1D	17q23.2	0 (0.00%)	3 (1.49%)	<-10	0.784	0.952	(B) White Patients
SLX4	16p13.3	0 (0.00%)	3 (1.52%)	<-10	0.791	0.952	(B) White Patients
RELA	11q13.1	0 (0.00%)	2 (3.13%)	<-10	0.811	0.952	(B) White Patients
AXIN1	16p13.3	0 (0.00%)	2 (1.29%)	<-10	0.812	0.952	(B) White Patients
DOT1L	19p13.3	0 (0.00%)	2 (1.29%)	<-10	0.812	0.952	(B) White Patients
IRF4	6p25.3	0 (0.00%)	2 (1.29%)	<-10	0.812	0.952	(B) White Patients
TGFBR2	3p24.1	0 (0.00%)	2 (1.29%)	<-10	0.812	0.952	(B) White Patients
TNFRSF14	1p36.32	0 (0.00%)	2 (1.29%)	<-10	0.812	0.952	(B) White Patients
COL7A1	3p21.31	0 (0.00%)	3 (5.00%)	<-10	0.821	0.952	(B) White Patients
CBFB	16q22.1	0 (0.00%)	2 (0.93%)	<-10	0.83	0.952	(B) White Patients
CDK12	17q12	0 (0.00%)	2 (0.93%)	<-10	0.83	0.952	(B) White Patients
CTCF	16q22.1	0 (0.00%)	2 (0.93%)	<-10	0.83	0.952	(B) White Patients
JAK1	1p31.3	0 (0.00%)	2 (0.93%)	<-10	0.83	0.952	(B) White Patients
KDM5A	12p13.33	0 (0.00%)	2 (0.93%)	<-10	0.83	0.952	(B) White Patients
PTPN1	20q13.13	0 (0.00%)	1 (20.00%)	<-10	0.833	0.952	(B) White Patients
HIST1H3B	6p22.2	0 (0.00%)	2 (0.93%)	<-10	0.836	0.952	(B) White Patients
ZFHX3	16q22.2-q22.3	0 (0.00%)	2 (1.41%)	<-10	0.839	0.952	(B) White Patients
AR	Xq12	0 (0.00%)	2 (0.75%)	<-10	0.842	0.952	(B) White Patients
ASXL1	20q11.21	0 (0.00%)	2 (0.75%)	<-10	0.842	0.952	(B) White Patients
AURKA	20q13.2	0 (0.00%)	2 (0.75%)	<-10	0.842	0.952	(B) White Patients
CDH1	16q22.1	0 (0.00%)	2 (0.75%)	<-10	0.842	0.952	(B) White Patients
EGFR	7p11.2	0 (0.00%)	2 (0.75%)	<-10	0.842	0.952	(B) White Patients
ERBB4	2q34	0 (0.00%)	2 (0.75%)	<-10	0.842	0.952	(B) White Patients
FLT1	13q12.3	0 (0.00%)	2 (0.75%)	<-10	0.842	0.952	(B) White Patients
JAK3	19p13.11	0 (0.00%)	2 (0.75%)	<-10	0.842	0.952	(B) White Patients
KDR	4q12	0 (0.00%)	2 (0.75%)	<-10	0.842	0.952	(B) White Patients
MAP2K4	17p12	0 (0.00%)	2 (0.75%)	<-10	0.842	0.952	(B) White Patients
NFE2L2	2q31.2	0 (0.00%)	2 (0.75%)	<-10	0.842	0.952	(B) White Patients
NKX2-1	14q13.3	0 (0.00%)	2 (0.75%)	<-10	0.842	0.952	(B) White Patients
NTRK3	15q25.3	0 (0.00%)	2 (0.75%)	<-10	0.842	0.952	(B) White Patients
RAF1	3p25.2	0 (0.00%)	2 (0.75%)	<-10	0.842	0.952	(B) White Patients
ROS1	6q22.1	0 (0.00%)	2 (0.75%)	<-10	0.842	0.952	(B) White Patients
TET2	4q24	0 (0.00%)	2 (0.75%)	<-10	0.842	0.952	(B) White Patients
STAT3	17q21.2	0 (0.00%)	2 (0.78%)	<-10	0.843	0.952	(B) White Patients
INPPL1	11q13.4	0 (0.00%)	2 (1.45%)	<-10	0.846	0.952	(B) White Patients
XIAP	Xq25	0 (0.00%)	2 (1.33%)	<-10	0.846	0.952	(B) White Patients
NOTCH2	1p12	0 (0.00%)	2 (0.75%)	<-10	0.847	0.952	(B) White Patients
DICER1	14q32.13	0 (0.00%)	2 (0.75%)	<-10	0.847	0.952	(B) White Patients
PMS1	2q32.2	0 (0.00%)	2 (0.75%)	<-10	0.847	0.952	(B) White Patients
WRN	8p12	0 (0.00%)	2 (1.71%)	<-10	0.848	0.952	(B) White Patients
ALOX12B	17p13.1	0 (0.00%)	2 (0.98%)	<-10	0.852	0.952	(B) White Patients
SUZ12	17q11.2	0 (0.00%)	2 (0.75%)	<-10	0.852	0.952	(B) White Patients
MTAP	9p21.3	0 (0.00%)	2 (3.23%)	<-10	0.855	0.952	(B) White Patients
POLQ	3q13.33	0 (0.00%)	2 (3.23%)	<-10	0.855	0.952	(B) White Patients
NTHL1	16p13.3	0 (0.00%)	2 (1.01%)	<-10	0.856	0.952	(B) White Patients
CTNNA1	5q31.2	0 (0.00%)	1 (1.54%)	<-10	0.89	0.952	(B) White Patients
MSH3	5q14.1	0 (0.00%)	1 (0.70%)	<-10	0.899	0.952	(B) White Patients
ERRFI1	1p36.23	0 (0.00%)	1 (0.69%)	<-10	0.901	0.952	(B) White Patients
BTK	Xq22.1	0 (0.00%)	1 (0.65%)	<-10	0.901	0.952	(B) White Patients
FGF19	11q13.3	0 (0.00%)	1 (0.65%)	<-10	0.901	0.952	(B) White Patients
FGF3	11q13.3	0 (0.00%)	1 (0.65%)	<-10	0.901	0.952	(B) White Patients
FGF4	11q13.3	0 (0.00%)	1 (0.65%)	<-10	0.901	0.952	(B) White Patients
IRS2	13q34	0 (0.00%)	1 (0.65%)	<-10	0.901	0.952	(B) White Patients
TBX3	12q24.21	0 (0.00%)	1 (0.65%)	<-10	0.901	0.952	(B) White Patients
ERCC1	19q13.32	0 (0.00%)	1 (1.56%)	<-10	0.901	0.952	(B) White Patients
KMT2B	19q13.12	0 (0.00%)	1 (0.70%)	<-10	0.904	0.952	(B) White Patients
MST1R	3p21.31	0 (0.00%)	1 (0.70%)	<-10	0.905	0.952	(B) White Patients
TRAF3	14q32.32	0 (0.00%)	1 (1.49%)	<-10	0.905	0.952	(B) White Patients
DNAJB1	19p13.12	0 (0.00%)	1 (0.69%)	<-10	0.906	0.952	(B) White Patients
NCOA3	20q13.12	0 (0.00%)	1 (0.69%)	<-10	0.906	0.952	(B) White Patients
NCOR1	17p12-p11.2	0 (0.00%)	1 (0.65%)	<-10	0.906	0.952	(B) White Patients
TOP1	20q12	0 (0.00%)	1 (0.65%)	<-10	0.906	0.952	(B) White Patients
POT1	7q31.33	0 (0.00%)	1 (1.47%)	<-10	0.907	0.952	(B) White Patients
DEPDC5	22q12.2-q12.3	0 (0.00%)	2 (4.76%)	<-10	0.91	0.952	(B) White Patients
NPRL2	3p21.31	0 (0.00%)	2 (4.76%)	<-10	0.91	0.952	(B) White Patients
DNMT1	19p13.2	0 (0.00%)	1 (0.66%)	<-10	0.91	0.952	(B) White Patients
TP63	3q28	0 (0.00%)	1 (0.66%)	<-10	0.91	0.952	(B) White Patients
PLCG2	16q23.3	0 (0.00%)	1 (0.70%)	<-10	0.91	0.952	(B) White Patients
STAT5A	17q21.2	0 (0.00%)	1 (0.70%)	<-10	0.91	0.952	(B) White Patients
STAT5B	17q21.2	0 (0.00%)	1 (0.70%)	<-10	0.91	0.952	(B) White Patients
MRE11	11q21	0 (0.00%)	1 (0.47%)	<-10	0.911	0.952	(B) White Patients
RAD51D	17q12	0 (0.00%)	1 (0.47%)	<-10	0.911	0.952	(B) White Patients
RBM10	Xp11.3	0 (0.00%)	1 (0.47%)	<-10	0.911	0.952	(B) White Patients
RICTOR	5p13.1	0 (0.00%)	1 (0.47%)	<-10	0.911	0.952	(B) White Patients
SPOP	17q21.33	0 (0.00%)	1 (0.47%)	<-10	0.911	0.952	(B) White Patients
VEGFA	6p21.1	0 (0.00%)	1 (0.49%)	<-10	0.911	0.952	(B) White Patients
FANCI	15q26.1	0 (0.00%)	1 (1.61%)	<-10	0.912	0.952	(B) White Patients
KAT6B	10q22.2	0 (0.00%)	1 (1.61%)	<-10	0.912	0.952	(B) White Patients
POLH	6p21.1	0 (0.00%)	1 (1.61%)	<-10	0.912	0.952	(B) White Patients
XRCC1	19q13.31	0 (0.00%)	1 (1.61%)	<-10	0.912	0.952	(B) White Patients
SRC	20q11.23	0 (0.00%)	1 (0.48%)	<-10	0.912	0.952	(B) White Patients
PPARG	3p25.2	0 (0.00%)	1 (0.50%)	<-10	0.914	0.952	(B) White Patients
TEK	9p21.2	0 (0.00%)	1 (0.72%)	<-10	0.914	0.952	(B) White Patients
FAT1	4q35.2	0 (0.00%)	1 (0.47%)	<-10	0.915	0.952	(B) White Patients
IGF2	11p15.5	0 (0.00%)	1 (0.47%)	<-10	0.915	0.952	(B) White Patients
IL7R	5p13.2	0 (0.00%)	1 (0.47%)	<-10	0.915	0.952	(B) White Patients
NSD1	5q35.3	0 (0.00%)	1 (0.47%)	<-10	0.915	0.952	(B) White Patients
TSHR	14q31.1	0 (0.00%)	1 (0.47%)	<-10	0.915	0.952	(B) White Patients
H3F3B	17q25.1	0 (0.00%)	1 (0.49%)	<-10	0.915	0.952	(B) White Patients
ELF3	1q32.1	0 (0.00%)	1 (0.71%)	<-10	0.915	0.952	(B) White Patients
EZH1	17q21.2	0 (0.00%)	1 (0.71%)	<-10	0.915	0.952	(B) White Patients
RRAS	19q13.33	0 (0.00%)	1 (0.71%)	<-10	0.915	0.952	(B) White Patients
MAP3K13	3q27.2	0 (0.00%)	1 (0.66%)	<-10	0.915	0.952	(B) White Patients
PIK3C2G	12p12.3	0 (0.00%)	1 (0.66%)	<-10	0.915	0.952	(B) White Patients
RAD51B	14q24.1	0 (0.00%)	1 (0.66%)	<-10	0.915	0.952	(B) White Patients
FYN	6q21	0 (0.00%)	1 (0.70%)	<-10	0.916	0.952	(B) White Patients
SH2D1A	Xq25	0 (0.00%)	1 (0.47%)	<-10	0.918	0.952	(B) White Patients
TET1	10q21.3	0 (0.00%)	1 (0.47%)	<-10	0.918	0.952	(B) White Patients
ABL1	9q34.12	0 (0.00%)	1 (0.37%)	<-10	0.918	0.952	(B) White Patients
ALK	2p23.2-p23.1	0 (0.00%)	1 (0.37%)	<-10	0.918	0.952	(B) White Patients
BCL6	3q27.3	0 (0.00%)	1 (0.37%)	<-10	0.918	0.952	(B) White Patients
BEND2	Xp22.13	0 (0.00%)	1 (0.37%)	<-10	0.918	0.952	(B) White Patients
CASC6	6q15	0 (0.00%)	1 (0.37%)	<-10	0.918	0.952	(B) White Patients
CCND1	11q13.3	0 (0.00%)	1 (0.37%)	<-10	0.918	0.952	(B) White Patients
CCND3	6p21.1	0 (0.00%)	1 (0.37%)	<-10	0.918	0.952	(B) White Patients
CCNE1	19q12	0 (0.00%)	1 (0.37%)	<-10	0.918	0.952	(B) White Patients
CD79B	17q23.3	0 (0.00%)	1 (0.37%)	<-10	0.918	0.952	(B) White Patients
CDC73	1q31.2	0 (0.00%)	1 (0.37%)	<-10	0.918	0.952	(B) White Patients
CPLANE1	5p13.2	0 (0.00%)	1 (0.37%)	<-10	0.918	0.952	(B) White Patients
DDR2	1q23.3	0 (0.00%)	1 (0.37%)	<-10	0.918	0.952	(B) White Patients
EMBP1	1p11.2	0 (0.00%)	1 (0.37%)	<-10	0.918	0.952	(B) White Patients
ERBB2	17q12	0 (0.00%)	1 (0.37%)	<-10	0.918	0.952	(B) White Patients
ERBB3	12q13.2	0 (0.00%)	1 (0.37%)	<-10	0.918	0.952	(B) White Patients
ESR1	6q25.1-q25.2	0 (0.00%)	1 (0.37%)	<-10	0.918	0.952	(B) White Patients
ETV6	12p13.2	0 (0.00%)	1 (0.37%)	<-10	0.918	0.952	(B) White Patients
FANCA	16q24.3	0 (0.00%)	1 (0.37%)	<-10	0.918	0.952	(B) White Patients
FANCC	9q22.32	0 (0.00%)	1 (0.37%)	<-10	0.918	0.952	(B) White Patients
FGFR1	8p11.23	0 (0.00%)	1 (0.37%)	<-10	0.918	0.952	(B) White Patients
FIP1L1	4q12	0 (0.00%)	1 (0.37%)	<-10	0.918	0.952	(B) White Patients
FLT3	13q12.2	0 (0.00%)	1 (0.37%)	<-10	0.918	0.952	(B) White Patients
GLRA3	4q34.1	0 (0.00%)	1 (0.37%)	<-10	0.918	0.952	(B) White Patients
IDH1	2q34	0 (0.00%)	1 (0.37%)	<-10	0.918	0.952	(B) White Patients
IDH2	15q26.1	0 (0.00%)	1 (0.37%)	<-10	0.918	0.952	(B) White Patients
KIT	4q12	0 (0.00%)	1 (0.37%)	<-10	0.918	0.952	(B) White Patients
MCL1	1q21.2	0 (0.00%)	1 (0.37%)	<-10	0.918	0.952	(B) White Patients
MPL	1p34.2	0 (0.00%)	1 (0.37%)	<-10	0.918	0.952	(B) White Patients
MYCL	1p34.2	0 (0.00%)	1 (0.37%)	<-10	0.918	0.952	(B) White Patients
NAB2	12q13.3	0 (0.00%)	1 (0.37%)	<-10	0.918	0.952	(B) White Patients
NTRK2	9q21.33	0 (0.00%)	1 (0.37%)	<-10	0.918	0.952	(B) White Patients
PDGFRB	5q32	0 (0.00%)	1 (0.37%)	<-10	0.918	0.952	(B) White Patients
PIK3CA	3q26.32	0 (0.00%)	1 (0.37%)	<-10	0.918	0.952	(B) White Patients
PIK3R1	5q13.1	0 (0.00%)	1 (0.37%)	<-10	0.918	0.952	(B) White Patients
PLIN4	19p13.3	0 (0.00%)	1 (0.37%)	<-10	0.918	0.952	(B) White Patients
PODNL1	19p13.12	0 (0.00%)	1 (0.37%)	<-10	0.918	0.952	(B) White Patients
PRKAR1A	17q24.2	0 (0.00%)	1 (0.37%)	<-10	0.918	0.952	(B) White Patients
PRKN	6q26	0 (0.00%)	1 (0.37%)	<-10	0.918	0.952	(B) White Patients
RARA	17q21.2	0 (0.00%)	1 (0.37%)	<-10	0.918	0.952	(B) White Patients
REX1BD	19p13.11	0 (0.00%)	1 (0.37%)	<-10	0.918	0.952	(B) White Patients
SF3B1	2q33.1	0 (0.00%)	1 (0.37%)	<-10	0.918	0.952	(B) White Patients
SOCS1	16p13.13	0 (0.00%)	1 (0.37%)	<-10	0.918	0.952	(B) White Patients
STAG2	Xq25	0 (0.00%)	1 (0.37%)	<-10	0.918	0.952	(B) White Patients
TNFAIP3	6q23.3	0 (0.00%)	1 (0.37%)	<-10	0.918	0.952	(B) White Patients
WDR11	10q26.12	0 (0.00%)	1 (0.37%)	<-10	0.918	0.952	(B) White Patients
WT1	11p13	0 (0.00%)	1 (0.37%)	<-10	0.918	0.952	(B) White Patients
YJEFN3	19p13.11	0 (0.00%)	1 (0.37%)	<-10	0.918	0.952	(B) White Patients
ZNF536	19q12	0 (0.00%)	1 (0.37%)	<-10	0.918	0.952	(B) White Patients
ID3	1p36.12	0 (0.00%)	1 (0.39%)	<-10	0.918	0.952	(B) White Patients
NFKBIA	14q13.2	0 (0.00%)	1 (0.39%)	<-10	0.918	0.952	(B) White Patients
DROSHA	5p13.3	0 (0.00%)	1 (0.72%)	<-10	0.92	0.952	(B) White Patients
MSI1	12q24.31	0 (0.00%)	1 (0.72%)	<-10	0.92	0.952	(B) White Patients
SESN1	6q21	0 (0.00%)	1 (0.72%)	<-10	0.92	0.952	(B) White Patients
SESN2	1p35.3	0 (0.00%)	1 (0.72%)	<-10	0.92	0.952	(B) White Patients
TAP2	6p21.32	0 (0.00%)	1 (0.72%)	<-10	0.92	0.952	(B) White Patients
UPF1	19p13.11	0 (0.00%)	1 (0.72%)	<-10	0.92	0.952	(B) White Patients
BCL2L11	2q13	0 (0.00%)	1 (0.67%)	<-10	0.92	0.952	(B) White Patients
DNMT3B	20q11.21	0 (0.00%)	1 (0.67%)	<-10	0.92	0.952	(B) White Patients
INPP4A	2q11.2	0 (0.00%)	1 (0.67%)	<-10	0.92	0.952	(B) White Patients
LATS2	13q12.11	0 (0.00%)	1 (0.67%)	<-10	0.92	0.952	(B) White Patients
RPS6KB2	11q13.2	0 (0.00%)	1 (0.67%)	<-10	0.92	0.952	(B) White Patients
SOX17	8q11.23	0 (0.00%)	1 (0.67%)	<-10	0.92	0.952	(B) White Patients
TGFBR1	9q22.33	0 (0.00%)	1 (0.67%)	<-10	0.92	0.952	(B) White Patients
PRKCI	3q26.2	0 (0.00%)	1 (0.39%)	<-10	0.92	0.952	(B) White Patients
CYLD	16q12.1	0 (0.00%)	1 (0.39%)	<-10	0.921	0.952	(B) White Patients
RUNX1	21q22.12	0 (0.00%)	1 (0.37%)	<-10	0.921	0.952	(B) White Patients
ANKRD11	16q24.3	0 (0.00%)	1 (0.71%)	<-10	0.921	0.952	(B) White Patients
HIST2H3C	1q21.2	0 (0.00%)	1 (0.71%)	<-10	0.921	0.952	(B) White Patients
HIST2H3D	1q21.2	0 (0.00%)	1 (0.71%)	<-10	0.921	0.952	(B) White Patients
GLI1	12q13.3	0 (0.00%)	1 (0.39%)	<-10	0.921	0.952	(B) White Patients
RASA1	5q14.3	0 (0.00%)	1 (0.47%)	<-10	0.922	0.952	(B) White Patients
CUX1	7q22.1	0 (0.00%)	1 (0.83%)	<-10	0.923	0.952	(B) White Patients
SETBP1	18q12.3	0 (0.00%)	1 (0.83%)	<-10	0.923	0.952	(B) White Patients
ERCC3	2q14.3	0 (0.00%)	1 (0.38%)	<-10	0.923	0.952	(B) White Patients
MAX	14q23.3	0 (0.00%)	1 (0.48%)	<-10	0.925	0.952	(B) White Patients
TMEM127	2q11.2	0 (0.00%)	1 (0.48%)	<-10	0.925	0.952	(B) White Patients
HIST1H3C	6p22.2	0 (0.00%)	1 (0.50%)	<-10	0.926	0.952	(B) White Patients
BUB1B	15q15.1	0 (0.00%)	1 (0.87%)	<-10	0.927	0.952	(B) White Patients
XPC	3p25.1	0 (0.00%)	1 (0.87%)	<-10	0.927	0.952	(B) White Patients
FANCD2	3p25.3	0 (0.00%)	1 (0.85%)	<-10	0.929	0.952	(B) White Patients
SLITRK6	13q31.1	0 (0.00%)	1 (2.27%)	<-10	0.936	0.952	(B) White Patients
DCLRE1C	10p13	0 (0.00%)	1 (1.67%)	<-10	0.937	0.952	(B) White Patients
ERCC6	10q11.23	0 (0.00%)	1 (1.67%)	<-10	0.937	0.952	(B) White Patients
EXO1	1q43	0 (0.00%)	1 (1.67%)	<-10	0.937	0.952	(B) White Patients
HABP2	10q25.3	0 (0.00%)	1 (1.67%)	<-10	0.937	0.952	(B) White Patients
HELQ	4q21.23	0 (0.00%)	1 (1.67%)	<-10	0.937	0.952	(B) White Patients
ITK	5q33.3	0 (0.00%)	1 (1.67%)	<-10	0.937	0.952	(B) White Patients
KIF1B	1p36.22	0 (0.00%)	1 (1.67%)	<-10	0.937	0.952	(B) White Patients
KLF2	19p13.11	0 (0.00%)	1 (1.67%)	<-10	0.937	0.952	(B) White Patients
MBD4	3q21.3	0 (0.00%)	1 (1.67%)	<-10	0.937	0.952	(B) White Patients
MCM8	20p12.3	0 (0.00%)	1 (1.67%)	<-10	0.937	0.952	(B) White Patients
MTA1	14q32.33	0 (0.00%)	1 (1.67%)	<-10	0.937	0.952	(B) White Patients
NECTIN4	1q23.3	0 (0.00%)	1 (1.67%)	<-10	0.937	0.952	(B) White Patients
PNKP	19q13.33	0 (0.00%)	1 (1.67%)	<-10	0.937	0.952	(B) White Patients
RHOT1	17q11.2	0 (0.00%)	1 (1.67%)	<-10	0.937	0.952	(B) White Patients
TLX3	5q35.1	0 (0.00%)	1 (1.67%)	<-10	0.937	0.952	(B) White Patients
UIMC1	5q35.2	0 (0.00%)	1 (1.67%)	<-10	0.937	0.952	(B) White Patients
UROD	1p34.1	0 (0.00%)	1 (1.67%)	<-10	0.937	0.952	(B) White Patients
CDKN1C	11p15.4	0 (0.00%)	1 (0.88%)	<-10	0.942	0.952	(B) White Patients
NFKBIZ	3q12.3	0 (0.00%)	1 (0.88%)	<-10	0.942	0.952	(B) White Patients
DMD	Xp21.2-p21.1	0 (0.00%)	1 (1.89%)	<-10	0.946	0.952	(B) White Patients
GSTM5	1p13.3	0 (0.00%)	1 (1.89%)	<-10	0.946	0.952	(B) White Patients
KDM6B	17p13.1	0 (0.00%)	1 (1.89%)	<-10	0.946	0.952	(B) White Patients
PRPF40B	12q13.12	0 (0.00%)	1 (1.89%)	<-10	0.946	0.952	(B) White Patients
PRPF8	17p13.3	0 (0.00%)	1 (1.89%)	<-10	0.946	0.952	(B) White Patients
SF1	11q13.1	0 (0.00%)	1 (1.89%)	<-10	0.946	0.952	(B) White Patients
STAG1	3q22.3	0 (0.00%)	1 (1.79%)	<-10	0.949	0.952	(B) White Patients
NPRL3	16p13.3	0 (0.00%)	1 (2.38%)	<-10	0.955	0.955	(B) White Patients

## Sheet: S. Data 2-STRING Interactions
#node1	node2	node1_string_id	node2_string_id	neighborhood_on_chromosome	gene_fusion	phylogenetic_cooccurrence	homology	coexpression	experimentally_determined_interaction	database_annotated	automated_textmining	combined_score
KMT2C	SIRT1	9606.ENSP00000262189	9606.ENSP00000212015	0	0	0	0	0.063	0.135	0	0.32	0.401
SIRT1	KMT2C	9606.ENSP00000212015	9606.ENSP00000262189	0	0	0	0	0.063	0.135	0	0.32	0.401
KDM6A	SMARCD3	9606.ENSP00000367203	9606.ENSP00000262188	0	0	0	0	0.049	0	0	0.399	0.404
SMARCD3	KDM6A	9606.ENSP00000262188	9606.ENSP00000367203	0	0	0	0	0.049	0	0	0.399	0.404
MDM2	SMAD2	9606.ENSP00000258149	9606.ENSP00000262160	0	0	0	0	0.077	0	0	0.392	0.414
SMAD2	MDM2	9606.ENSP00000262160	9606.ENSP00000258149	0	0	0	0	0.077	0	0	0.392	0.414
EP300	SMARCD3	9606.ENSP00000263253	9606.ENSP00000262188	0	0	0	0	0.062	0.244	0	0.243	0.416
SMARCD3	EP300	9606.ENSP00000262188	9606.ENSP00000263253	0	0	0	0	0.062	0.244	0	0.243	0.416
KMT2D	SIRT1	9606.ENSP00000301067	9606.ENSP00000212015	0	0	0	0	0.062	0.135	0	0.347	0.423
SIRT1	KMT2D	9606.ENSP00000212015	9606.ENSP00000301067	0	0	0	0	0.062	0.135	0	0.347	0.423
SMARCB1	YY1	9606.ENSP00000263121	9606.ENSP00000262238	0	0	0	0	0.088	0.135	0	0.332	0.427
YY1	SMARCB1	9606.ENSP00000262238	9606.ENSP00000263121	0	0	0	0	0.088	0.135	0	0.332	0.427
KDM6A	MEN1	9606.ENSP00000367203	9606.ENSP00000337088	0	0	0	0	0	0	0	0.44	0.44
MEN1	KDM6A	9606.ENSP00000337088	9606.ENSP00000367203	0	0	0	0	0	0	0	0.44	0.44
KDM6A	SMARCC1	9606.ENSP00000367203	9606.ENSP00000254480	0	0	0	0	0.11	0.1	0	0.364	0.446
SMARCC1	KDM6A	9606.ENSP00000254480	9606.ENSP00000367203	0	0	0	0	0.11	0.1	0	0.364	0.446
KAT2B	SMARCD3	9606.ENSP00000263754	9606.ENSP00000262188	0	0	0	0	0.083	0.244	0	0.294	0.468
SMARCD3	KAT2B	9606.ENSP00000262188	9606.ENSP00000263754	0	0	0	0	0.083	0.244	0	0.294	0.468
SIRT1	SMAD2	9606.ENSP00000212015	9606.ENSP00000262160	0	0	0	0	0.063	0.057	0	0.452	0.474
SMAD2	SIRT1	9606.ENSP00000262160	9606.ENSP00000212015	0	0	0	0	0.063	0.057	0	0.452	0.474
KMT2D	SMARCB1	9606.ENSP00000301067	9606.ENSP00000263121	0	0	0	0	0.065	0.112	0	0.445	0.499
SMARCB1	KMT2D	9606.ENSP00000263121	9606.ENSP00000301067	0	0	0	0	0.065	0.112	0	0.445	0.499
KDM6A	SIRT1	9606.ENSP00000367203	9606.ENSP00000212015	0.047	0	0	0	0.099	0.103	0	0.475	0.542
SIRT1	KDM6A	9606.ENSP00000212015	9606.ENSP00000367203	0.047	0	0	0	0.099	0.103	0	0.475	0.542
KMT2C	MEN1	9606.ENSP00000262189	9606.ENSP00000337088	0	0	0	0	0	0.104	0	0.536	0.566
MEN1	KMT2C	9606.ENSP00000337088	9606.ENSP00000262189	0	0	0	0	0	0.104	0	0.536	0.566
EP300	SMARCC1	9606.ENSP00000263253	9606.ENSP00000254480	0	0	0	0	0.076	0.317	0	0.397	0.587
KDM6A	SMARCB1	9606.ENSP00000367203	9606.ENSP00000263121	0	0	0	0	0.062	0.105	0	0.547	0.587
SMARCB1	KDM6A	9606.ENSP00000263121	9606.ENSP00000367203	0	0	0	0	0.062	0.105	0	0.547	0.587
SMARCC1	EP300	9606.ENSP00000254480	9606.ENSP00000263253	0	0	0	0	0.076	0.317	0	0.397	0.587
MYOD1	YY1	9606.ENSP00000250003	9606.ENSP00000262238	0	0	0	0	0	0.06	0	0.585	0.593
YY1	MYOD1	9606.ENSP00000262238	9606.ENSP00000250003	0	0	0	0	0	0.06	0	0.585	0.593
KAT2B	KDM6A	9606.ENSP00000263754	9606.ENSP00000367203	0	0	0	0	0.065	0.166	0	0.525	0.597
KDM6A	KAT2B	9606.ENSP00000367203	9606.ENSP00000263754	0	0	0	0	0.065	0.166	0	0.525	0.597
SMAD2	YY1	9606.ENSP00000262160	9606.ENSP00000262238	0	0	0	0	0.062	0.487	0	0.277	0.622
YY1	SMAD2	9606.ENSP00000262238	9606.ENSP00000262160	0	0	0	0	0.062	0.487	0	0.277	0.622
KMT2C	YY1	9606.ENSP00000262189	9606.ENSP00000262238	0	0	0	0	0.052	0.106	0.6	0.123	0.663
YY1	KMT2C	9606.ENSP00000262238	9606.ENSP00000262189	0	0	0	0	0.052	0.106	0.6	0.123	0.663
MDM2	SIRT1	9606.ENSP00000258149	9606.ENSP00000212015	0	0	0	0	0.062	0.27	0	0.57	0.68
SIRT1	MDM2	9606.ENSP00000212015	9606.ENSP00000258149	0	0	0	0	0.062	0.27	0	0.57	0.68
RBBP5	SMARCC1	9606.ENSP00000264515	9606.ENSP00000254480	0	0	0	0	0.082	0.618	0	0.178	0.686
SMARCC1	RBBP5	9606.ENSP00000254480	9606.ENSP00000264515	0	0	0	0	0.082	0.618	0	0.178	0.686
RBBP5	YY1	9606.ENSP00000264515	9606.ENSP00000262238	0	0	0	0	0.145	0	0.6	0.178	0.694
YY1	RBBP5	9606.ENSP00000262238	9606.ENSP00000264515	0	0	0	0	0.145	0	0.6	0.178	0.694
KMT2D	YY1	9606.ENSP00000301067	9606.ENSP00000262238	0	0	0	0	0.058	0.106	0.6	0.216	0.701
YY1	KMT2D	9606.ENSP00000262238	9606.ENSP00000301067	0	0	0	0	0.058	0.106	0.6	0.216	0.701
SMAD2	SMARCC1	9606.ENSP00000262160	9606.ENSP00000254480	0	0	0	0	0.064	0.677	0	0.104	0.706
SMARCC1	SMAD2	9606.ENSP00000254480	9606.ENSP00000262160	0	0	0	0	0.064	0.677	0	0.104	0.706
KAT2B	RBBP5	9606.ENSP00000263754	9606.ENSP00000264515	0	0	0	0	0.062	0.061	0.6	0.311	0.725
RBBP5	KAT2B	9606.ENSP00000264515	9606.ENSP00000263754	0	0	0	0	0.062	0.061	0.6	0.311	0.725
KDM6A	YY1	9606.ENSP00000367203	9606.ENSP00000262238	0	0	0	0	0.062	0.162	0.6	0.245	0.731
YY1	KDM6A	9606.ENSP00000262238	9606.ENSP00000367203	0	0	0	0	0.062	0.162	0.6	0.245	0.731
EP300	SMARCB1	9606.ENSP00000263253	9606.ENSP00000263121	0	0	0	0	0.064	0.245	0	0.65	0.732
SMARCB1	EP300	9606.ENSP00000263121	9606.ENSP00000263253	0	0	0	0	0.064	0.245	0	0.65	0.732
KAT2B	KMT2C	9606.ENSP00000263754	9606.ENSP00000262189	0	0	0	0	0.065	0.102	0.6	0.343	0.75
KMT2C	KAT2B	9606.ENSP00000262189	9606.ENSP00000263754	0	0	0	0	0.065	0.102	0.6	0.343	0.75
KAT2B	KMT2D	9606.ENSP00000263754	9606.ENSP00000301067	0	0	0	0	0.065	0.102	0.6	0.395	0.769
KMT2D	KAT2B	9606.ENSP00000301067	9606.ENSP00000263754	0	0	0	0	0.065	0.102	0.6	0.395	0.769
MEN1	SMAD2	9606.ENSP00000337088	9606.ENSP00000262160	0	0	0	0	0	0.078	0.6	0.441	0.775
SMAD2	MEN1	9606.ENSP00000262160	9606.ENSP00000337088	0	0	0	0	0	0.078	0.6	0.441	0.775
EP300	RBBP5	9606.ENSP00000263253	9606.ENSP00000264515	0	0	0	0	0.062	0.142	0.6	0.392	0.778
RBBP5	EP300	9606.ENSP00000264515	9606.ENSP00000263253	0	0	0	0	0.062	0.142	0.6	0.392	0.778
EP300	PDX1	9606.ENSP00000263253	9606.ENSP00000370421	0	0	0	0	0	0.078	0	0.793	0.801
PDX1	EP300	9606.ENSP00000370421	9606.ENSP00000263253	0	0	0	0	0	0.078	0	0.793	0.801
MYOD1	SMAD2	9606.ENSP00000250003	9606.ENSP00000262160	0	0	0	0	0	0.372	0	0.742	0.831
SMAD2	MYOD1	9606.ENSP00000262160	9606.ENSP00000250003	0	0	0	0	0	0.372	0	0.742	0.831
KMT2C	SMARCB1	9606.ENSP00000262189	9606.ENSP00000263121	0	0	0	0	0.062	0.324	0	0.831	0.884
SMARCB1	KMT2C	9606.ENSP00000263121	9606.ENSP00000262189	0	0	0	0	0.062	0.324	0	0.831	0.884
SIRT1	YY1	9606.ENSP00000212015	9606.ENSP00000262238	0	0	0	0	0.097	0.058	0	0.894	0.903
YY1	SIRT1	9606.ENSP00000262238	9606.ENSP00000212015	0	0	0	0	0.097	0.058	0	0.894	0.903
EP300	KDM6A	9606.ENSP00000263253	9606.ENSP00000367203	0	0	0	0	0.066	0.212	0.6	0.767	0.922
KDM6A	EP300	9606.ENSP00000367203	9606.ENSP00000263253	0	0	0	0	0.066	0.212	0.6	0.767	0.922
MEN1	SIRT1	9606.ENSP00000337088	9606.ENSP00000212015	0	0	0	0	0	0	0	0.936	0.936
SIRT1	MEN1	9606.ENSP00000212015	9606.ENSP00000337088	0	0	0	0	0	0	0	0.936	0.936
KAT2B	SMARCC1	9606.ENSP00000263754	9606.ENSP00000254480	0	0	0	0	0.094	0.249	0.9	0.445	0.957
SMARCC1	KAT2B	9606.ENSP00000254480	9606.ENSP00000263754	0	0	0	0	0.094	0.249	0.9	0.445	0.957
KAT2B	YY1	9606.ENSP00000263754	9606.ENSP00000262238	0	0	0	0	0	0.334	0.9	0.469	0.961
YY1	KAT2B	9606.ENSP00000262238	9606.ENSP00000263754	0	0	0	0	0	0.334	0.9	0.469	0.961
KAT2B	SMARCB1	9606.ENSP00000263754	9606.ENSP00000263121	0	0	0	0	0.066	0.426	0.9	0.591	0.975
SMARCB1	KAT2B	9606.ENSP00000263121	9606.ENSP00000263754	0	0	0	0	0.066	0.426	0.9	0.591	0.975
EP300	KMT2C	9606.ENSP00000263253	9606.ENSP00000262189	0	0	0	0	0.831	0.244	0.6	0.588	0.976
KAT2B	SMAD2	9606.ENSP00000263754	9606.ENSP00000262160	0	0	0	0	0.064	0.697	0.9	0.26	0.976
KMT2C	EP300	9606.ENSP00000262189	9606.ENSP00000263253	0	0	0	0	0.831	0.244	0.6	0.588	0.976
SMAD2	KAT2B	9606.ENSP00000262160	9606.ENSP00000263754	0	0	0	0	0.064	0.697	0.9	0.26	0.976
EP300	KMT2D	9606.ENSP00000263253	9606.ENSP00000301067	0	0	0	0	0.831	0.244	0.6	0.682	0.981
KMT2D	EP300	9606.ENSP00000301067	9606.ENSP00000263253	0	0	0	0	0.831	0.244	0.6	0.682	0.981
MEN1	RBBP5	9606.ENSP00000337088	9606.ENSP00000264515	0	0	0	0	0.086	0.675	0.8	0.798	0.986
RBBP5	MEN1	9606.ENSP00000264515	9606.ENSP00000337088	0	0	0	0	0.086	0.675	0.8	0.798	0.986
KAT2B	MDM2	9606.ENSP00000263754	9606.ENSP00000258149	0	0	0	0	0	0.838	0.9	0.408	0.989
MDM2	KAT2B	9606.ENSP00000258149	9606.ENSP00000263754	0	0	0	0	0	0.838	0.9	0.408	0.989
MDM2	YY1	9606.ENSP00000258149	9606.ENSP00000262238	0	0	0	0	0	0.486	0.9	0.825	0.99
YY1	MDM2	9606.ENSP00000262238	9606.ENSP00000258149	0	0	0	0	0	0.486	0.9	0.825	0.99
KAT2B	SIRT1	9606.ENSP00000263754	9606.ENSP00000212015	0	0	0	0	0.066	0.376	0.9	0.892	0.992
MYOD1	SMARCD3	9606.ENSP00000250003	9606.ENSP00000262188	0	0	0	0	0	0.345	0	0.989	0.992
SIRT1	KAT2B	9606.ENSP00000212015	9606.ENSP00000263754	0	0	0	0	0.066	0.376	0.9	0.892	0.992
SMARCD3	MYOD1	9606.ENSP00000262188	9606.ENSP00000250003	0	0	0	0	0	0.345	0	0.989	0.992
KMT2C	KMT2D	9606.ENSP00000262189	9606.ENSP00000301067	0	0	0	0.761	0.825	0.553	0.9	0.989	0.993
KMT2D	KMT2C	9606.ENSP00000301067	9606.ENSP00000262189	0	0	0	0.761	0.825	0.553	0.9	0.989	0.993
KMT2D	MEN1	9606.ENSP00000301067	9606.ENSP00000337088	0	0	0	0	0.045	0.345	0.8	0.972	0.996
MEN1	KMT2D	9606.ENSP00000337088	9606.ENSP00000301067	0	0	0	0	0.045	0.345	0.8	0.972	0.996
KAT2B	MYOD1	9606.ENSP00000263754	9606.ENSP00000250003	0	0	0	0	0	0.888	0.9	0.801	0.997
MYOD1	SIRT1	9606.ENSP00000250003	9606.ENSP00000212015	0	0	0	0	0	0.273	0.9	0.963	0.997
MYOD1	KAT2B	9606.ENSP00000250003	9606.ENSP00000263754	0	0	0	0	0	0.888	0.9	0.801	0.997
SIRT1	MYOD1	9606.ENSP00000212015	9606.ENSP00000250003	0	0	0	0	0	0.273	0.9	0.963	0.997
SMARCC1	SMARCD3	9606.ENSP00000254480	9606.ENSP00000262188	0	0	0	0	0.09	0.92	0.9	0.808	0.998
SMARCD3	SMARCC1	9606.ENSP00000262188	9606.ENSP00000254480	0	0	0	0	0.09	0.92	0.9	0.808	0.998
EP300	SIRT1	9606.ENSP00000263253	9606.ENSP00000212015	0	0	0	0	0.099	0.733	0.9	0.979	0.999
EP300	MYOD1	9606.ENSP00000263253	9606.ENSP00000250003	0	0	0	0	0	0.882	0.9	0.988	0.999
EP300	MDM2	9606.ENSP00000263253	9606.ENSP00000258149	0	0	0	0	0	0.874	0.9	0.989	0.999
EP300	SMAD2	9606.ENSP00000263253	9606.ENSP00000262160	0	0	0	0	0.049	0.786	0.9	0.972	0.999
EP300	YY1	9606.ENSP00000263253	9606.ENSP00000262238	0	0	0	0	0.065	0.884	0.9	0.984	0.999
EP300	KAT2B	9606.ENSP00000263253	9606.ENSP00000263754	0	0	0	0	0.062	0.883	0.9	0.987	0.999
KAT2B	EP300	9606.ENSP00000263754	9606.ENSP00000263253	0	0	0	0	0.062	0.883	0.9	0.987	0.999
KDM6A	KMT2C	9606.ENSP00000367203	9606.ENSP00000262189	0	0	0	0	0.072	0.897	0.9	0.993	0.999
KDM6A	RBBP5	9606.ENSP00000367203	9606.ENSP00000264515	0	0	0	0	0.063	0.986	0.9	0.914	0.999
KDM6A	KMT2D	9606.ENSP00000367203	9606.ENSP00000301067	0	0	0	0	0.072	0.918	0.9	0.993	0.999
KMT2C	RBBP5	9606.ENSP00000262189	9606.ENSP00000264515	0	0	0	0	0.065	0.978	0.9	0.952	0.999
KMT2C	KDM6A	9606.ENSP00000262189	9606.ENSP00000367203	0	0	0	0	0.072	0.897	0.9	0.993	0.999
KMT2D	RBBP5	9606.ENSP00000301067	9606.ENSP00000264515	0	0	0	0	0.065	0.911	0.9	0.974	0.999
KMT2D	KDM6A	9606.ENSP00000301067	9606.ENSP00000367203	0	0	0	0	0.072	0.918	0.9	0.993	0.999
MDM2	EP300	9606.ENSP00000258149	9606.ENSP00000263253	0	0	0	0	0	0.874	0.9	0.989	0.999
MYOD1	EP300	9606.ENSP00000250003	9606.ENSP00000263253	0	0	0	0	0	0.882	0.9	0.988	0.999
RBBP5	KMT2C	9606.ENSP00000264515	9606.ENSP00000262189	0	0	0	0	0.065	0.978	0.9	0.952	0.999
RBBP5	KDM6A	9606.ENSP00000264515	9606.ENSP00000367203	0	0	0	0	0.063	0.986	0.9	0.914	0.999
RBBP5	KMT2D	9606.ENSP00000264515	9606.ENSP00000301067	0	0	0	0	0.065	0.911	0.9	0.974	0.999
SIRT1	EP300	9606.ENSP00000212015	9606.ENSP00000263253	0	0	0	0	0.099	0.733	0.9	0.979	0.999
SMAD2	EP300	9606.ENSP00000262160	9606.ENSP00000263253	0	0	0	0	0.049	0.786	0.9	0.972	0.999
SMARCB1	SMARCC1	9606.ENSP00000263121	9606.ENSP00000254480	0	0	0	0	0.13	0.996	0.9	0.994	0.999
SMARCB1	SMARCD3	9606.ENSP00000263121	9606.ENSP00000262188	0	0	0	0	0.126	0.963	0.9	0.748	0.999
SMARCC1	SMARCB1	9606.ENSP00000254480	9606.ENSP00000263121	0	0	0	0	0.13	0.996	0.9	0.994	0.999
SMARCD3	SMARCB1	9606.ENSP00000262188	9606.ENSP00000263121	0	0	0	0	0.126	0.963	0.9	0.748	0.999
YY1	EP300	9606.ENSP00000262238	9606.ENSP00000263253	0	0	0	0	0.065	0.884	0.9	0.984	0.999

## Sheet: S. Data 3-GO Enrichment
#category	term ID	term description	observed gene count	background gene count	strength	false discovery rate	matching proteins in your network (IDs)	matching proteins in your network (labels)
GO Process	GO:0006325	Chromatin organization	12	713	1.31	1.07e-10	9606.ENSP00000212015,9606.ENSP00000250003,9606.ENSP00000254480,9606.ENSP00000262188,9606.ENSP00000262189,9606.ENSP00000263121,9606.ENSP00000263253,9606.ENSP00000263754,9606.ENSP00000264515,9606.ENSP00000301067,9606.ENSP00000337088,9606.ENSP00000367203	SIRT1,MYOD1,SMARCC1,SMARCD3,KMT2C,SMARCB1,EP300,KAT2B,RBBP5,KMT2D,MEN1,KDM6A
GO Process	GO:0018205	Peptidyl-lysine modification	10	299	1.61	1.07e-10	9606.ENSP00000212015,9606.ENSP00000250003,9606.ENSP00000258149,9606.ENSP00000262189,9606.ENSP00000263253,9606.ENSP00000263754,9606.ENSP00000264515,9606.ENSP00000301067,9606.ENSP00000337088,9606.ENSP00000367203	SIRT1,MYOD1,MDM2,KMT2C,EP300,KAT2B,RBBP5,KMT2D,MEN1,KDM6A
GO Process	GO:0051276	Chromosome organization	13	1066	1.17	1.13e-10	9606.ENSP00000212015,9606.ENSP00000250003,9606.ENSP00000254480,9606.ENSP00000262188,9606.ENSP00000262189,9606.ENSP00000262238,9606.ENSP00000263121,9606.ENSP00000263253,9606.ENSP00000263754,9606.ENSP00000264515,9606.ENSP00000301067,9606.ENSP00000337088,9606.ENSP00000367203	SIRT1,MYOD1,SMARCC1,SMARCD3,KMT2C,YY1,SMARCB1,EP300,KAT2B,RBBP5,KMT2D,MEN1,KDM6A
GO Process	GO:0010628	Positive regulation of gene expression	15	2337	0.89	9.34e-10	9606.ENSP00000212015,9606.ENSP00000250003,9606.ENSP00000254480,9606.ENSP00000258149,9606.ENSP00000262160,9606.ENSP00000262188,9606.ENSP00000262189,9606.ENSP00000262238,9606.ENSP00000263121,9606.ENSP00000263253,9606.ENSP00000263754,9606.ENSP00000301067,9606.ENSP00000337088,9606.ENSP00000367203,9606.ENSP00000370421	SIRT1,MYOD1,SMARCC1,MDM2,SMAD2,SMARCD3,KMT2C,YY1,SMARCB1,EP300,KAT2B,KMT2D,MEN1,KDM6A,PDX1
GO Process	GO:0016570	Histone modification	9	351	1.5	7.77e-09	9606.ENSP00000212015,9606.ENSP00000250003,9606.ENSP00000262189,9606.ENSP00000263253,9606.ENSP00000263754,9606.ENSP00000264515,9606.ENSP00000301067,9606.ENSP00000337088,9606.ENSP00000367203	SIRT1,MYOD1,KMT2C,EP300,KAT2B,RBBP5,KMT2D,MEN1,KDM6A
GO Process	GO:0045893	Positive regulation of transcription, dna-templated	13	1587	1	8.28e-09	9606.ENSP00000212015,9606.ENSP00000250003,9606.ENSP00000254480,9606.ENSP00000262160,9606.ENSP00000262188,9606.ENSP00000262189,9606.ENSP00000262238,9606.ENSP00000263121,9606.ENSP00000263253,9606.ENSP00000263754,9606.ENSP00000301067,9606.ENSP00000337088,9606.ENSP00000370421	SIRT1,MYOD1,SMARCC1,SMAD2,SMARCD3,KMT2C,YY1,SMARCB1,EP300,KAT2B,KMT2D,MEN1,PDX1
GO Process	GO:0006357	Regulation of transcription by rna polymerase ii	14	2172	0.9	8.6e-09	9606.ENSP00000212015,9606.ENSP00000250003,9606.ENSP00000254480,9606.ENSP00000258149,9606.ENSP00000262160,9606.ENSP00000262188,9606.ENSP00000262189,9606.ENSP00000262238,9606.ENSP00000263121,9606.ENSP00000263253,9606.ENSP00000263754,9606.ENSP00000301067,9606.ENSP00000337088,9606.ENSP00000370421	SIRT1,MYOD1,SMARCC1,MDM2,SMAD2,SMARCD3,KMT2C,YY1,SMARCB1,EP300,KAT2B,KMT2D,MEN1,PDX1
GO Process	GO:0009725	Response to hormone	11	849	1.2	8.6e-09	9606.ENSP00000212015,9606.ENSP00000250003,9606.ENSP00000254480,9606.ENSP00000258149,9606.ENSP00000262238,9606.ENSP00000263253,9606.ENSP00000263754,9606.ENSP00000264515,9606.ENSP00000301067,9606.ENSP00000337088,9606.ENSP00000370421	SIRT1,MYOD1,SMARCC1,MDM2,YY1,EP300,KAT2B,RBBP5,KMT2D,MEN1,PDX1
GO Process	GO:0045944	Positive regulation of transcription by rna polymerase ii	12	1253	1.07	1.05e-08	9606.ENSP00000212015,9606.ENSP00000250003,9606.ENSP00000254480,9606.ENSP00000262160,9606.ENSP00000262189,9606.ENSP00000262238,9606.ENSP00000263121,9606.ENSP00000263253,9606.ENSP00000263754,9606.ENSP00000301067,9606.ENSP00000337088,9606.ENSP00000370421	SIRT1,MYOD1,SMARCC1,SMAD2,KMT2C,YY1,SMARCB1,EP300,KAT2B,KMT2D,MEN1,PDX1
GO Process	GO:0009719	Response to endogenous stimulus	12	1447	1.01	4.21e-08	9606.ENSP00000212015,9606.ENSP00000250003,9606.ENSP00000254480,9606.ENSP00000258149,9606.ENSP00000262160,9606.ENSP00000262238,9606.ENSP00000263253,9606.ENSP00000263754,9606.ENSP00000264515,9606.ENSP00000301067,9606.ENSP00000337088,9606.ENSP00000370421	SIRT1,MYOD1,SMARCC1,MDM2,SMAD2,YY1,EP300,KAT2B,RBBP5,KMT2D,MEN1,PDX1
GO Process	GO:0045595	Regulation of cell differentiation	12	1874	0.89	6.18e-07	9606.ENSP00000212015,9606.ENSP00000250003,9606.ENSP00000258149,9606.ENSP00000262160,9606.ENSP00000262188,9606.ENSP00000262189,9606.ENSP00000262238,9606.ENSP00000263253,9606.ENSP00000263754,9606.ENSP00000264515,9606.ENSP00000301067,9606.ENSP00000337088	SIRT1,MYOD1,MDM2,SMAD2,SMARCD3,KMT2C,YY1,EP300,KAT2B,RBBP5,KMT2D,MEN1
GO Process	GO:0051173	Positive regulation of nitrogen compound metabolic process	14	3239	0.72	7.78e-07	9606.ENSP00000212015,9606.ENSP00000250003,9606.ENSP00000254480,9606.ENSP00000258149,9606.ENSP00000262160,9606.ENSP00000262188,9606.ENSP00000262189,9606.ENSP00000262238,9606.ENSP00000263121,9606.ENSP00000263253,9606.ENSP00000263754,9606.ENSP00000301067,9606.ENSP00000337088,9606.ENSP00000370421	SIRT1,MYOD1,SMARCC1,MDM2,SMAD2,SMARCD3,KMT2C,YY1,SMARCB1,EP300,KAT2B,KMT2D,MEN1,PDX1
GO Process	GO:0031325	Positive regulation of cellular metabolic process	14	3413	0.7	1.46e-06	9606.ENSP00000212015,9606.ENSP00000250003,9606.ENSP00000254480,9606.ENSP00000258149,9606.ENSP00000262160,9606.ENSP00000262188,9606.ENSP00000262189,9606.ENSP00000262238,9606.ENSP00000263121,9606.ENSP00000263253,9606.ENSP00000263754,9606.ENSP00000301067,9606.ENSP00000337088,9606.ENSP00000370421	SIRT1,MYOD1,SMARCC1,MDM2,SMAD2,SMARCD3,KMT2C,YY1,SMARCB1,EP300,KAT2B,KMT2D,MEN1,PDX1
GO Process	GO:0034968	Histone lysine methylation	5	71	1.94	2.04e-06	9606.ENSP00000262189,9606.ENSP00000264515,9606.ENSP00000301067,9606.ENSP00000337088,9606.ENSP00000367203	KMT2C,RBBP5,KMT2D,MEN1,KDM6A
GO Process	GO:0045652	Regulation of megakaryocyte differentiation	5	82	1.87	3.91e-06	9606.ENSP00000262189,9606.ENSP00000263253,9606.ENSP00000263754,9606.ENSP00000264515,9606.ENSP00000301067	KMT2C,EP300,KAT2B,RBBP5,KMT2D
GO Process	GO:0006338	Chromatin remodeling	6	206	1.55	5.82e-06	9606.ENSP00000212015,9606.ENSP00000254480,9606.ENSP00000262188,9606.ENSP00000263121,9606.ENSP00000263754,9606.ENSP00000367203	SIRT1,SMARCC1,SMARCD3,SMARCB1,KAT2B,KDM6A
GO Process	GO:1904837	beta-catenin-TCF complex assembly	4	29	2.23	6.05e-06	9606.ENSP00000263253,9606.ENSP00000264515,9606.ENSP00000301067,9606.ENSP00000337088	EP300,RBBP5,KMT2D,MEN1
GO Process	GO:0044260	Cellular macromolecule metabolic process	15	4976	0.57	7.06e-06	9606.ENSP00000212015,9606.ENSP00000250003,9606.ENSP00000258149,9606.ENSP00000262160,9606.ENSP00000262188,9606.ENSP00000262189,9606.ENSP00000262238,9606.ENSP00000263121,9606.ENSP00000263253,9606.ENSP00000263754,9606.ENSP00000264515,9606.ENSP00000301067,9606.ENSP00000337088,9606.ENSP00000367203,9606.ENSP00000370421	SIRT1,MYOD1,MDM2,SMAD2,SMARCD3,KMT2C,YY1,SMARCB1,EP300,KAT2B,RBBP5,KMT2D,MEN1,KDM6A,PDX1
GO Process	GO:0051568	Histone h3-k4 methylation	4	37	2.12	1.26e-05	9606.ENSP00000262189,9606.ENSP00000264515,9606.ENSP00000301067,9606.ENSP00000367203	KMT2C,RBBP5,KMT2D,KDM6A
GO Process	GO:0016043	Cellular component organization	15	5447	0.53	2.18e-05	9606.ENSP00000212015,9606.ENSP00000250003,9606.ENSP00000254480,9606.ENSP00000258149,9606.ENSP00000262160,9606.ENSP00000262188,9606.ENSP00000262189,9606.ENSP00000262238,9606.ENSP00000263121,9606.ENSP00000263253,9606.ENSP00000263754,9606.ENSP00000264515,9606.ENSP00000301067,9606.ENSP00000337088,9606.ENSP00000367203	SIRT1,MYOD1,SMARCC1,MDM2,SMAD2,SMARCD3,KMT2C,YY1,SMARCB1,EP300,KAT2B,RBBP5,KMT2D,MEN1,KDM6A
GO Process	GO:2000026	Regulation of multicellular organismal development	11	2096	0.81	2.18e-05	9606.ENSP00000212015,9606.ENSP00000250003,9606.ENSP00000258149,9606.ENSP00000262160,9606.ENSP00000262188,9606.ENSP00000262189,9606.ENSP00000262238,9606.ENSP00000263253,9606.ENSP00000263754,9606.ENSP00000264515,9606.ENSP00000301067	SIRT1,MYOD1,MDM2,SMAD2,SMARCD3,KMT2C,YY1,EP300,KAT2B,RBBP5,KMT2D
GO Process	GO:0009411	Response to uv	5	144	1.63	3.41e-05	9606.ENSP00000212015,9606.ENSP00000258149,9606.ENSP00000262238,9606.ENSP00000263253,9606.ENSP00000337088	SIRT1,MDM2,YY1,EP300,MEN1
GO Process	GO:0051147	Regulation of muscle cell differentiation	5	154	1.6	4.62e-05	9606.ENSP00000212015,9606.ENSP00000250003,9606.ENSP00000258149,9606.ENSP00000262188,9606.ENSP00000262238	SIRT1,MYOD1,MDM2,SMARCD3,YY1
GO Process	GO:0010033	Response to organic substance	12	3011	0.69	5.98e-05	9606.ENSP00000212015,9606.ENSP00000250003,9606.ENSP00000254480,9606.ENSP00000258149,9606.ENSP00000262160,9606.ENSP00000262238,9606.ENSP00000263253,9606.ENSP00000263754,9606.ENSP00000264515,9606.ENSP00000301067,9606.ENSP00000337088,9606.ENSP00000370421	SIRT1,MYOD1,SMARCC1,MDM2,SMAD2,YY1,EP300,KAT2B,RBBP5,KMT2D,MEN1,PDX1
GO Process	GO:0006464	Cellular protein modification process	12	3063	0.68	7.12e-05	9606.ENSP00000212015,9606.ENSP00000250003,9606.ENSP00000258149,9606.ENSP00000262160,9606.ENSP00000262189,9606.ENSP00000262238,9606.ENSP00000263253,9606.ENSP00000263754,9606.ENSP00000264515,9606.ENSP00000301067,9606.ENSP00000337088,9606.ENSP00000367203	SIRT1,MYOD1,MDM2,SMAD2,KMT2C,YY1,EP300,KAT2B,RBBP5,KMT2D,MEN1,KDM6A
GO Process	GO:0051172	Negative regulation of nitrogen compound metabolic process	11	2429	0.74	8.39e-05	9606.ENSP00000212015,9606.ENSP00000254480,9606.ENSP00000258149,9606.ENSP00000262160,9606.ENSP00000262238,9606.ENSP00000263121,9606.ENSP00000263253,9606.ENSP00000263754,9606.ENSP00000301067,9606.ENSP00000337088,9606.ENSP00000370421	SIRT1,SMARCC1,MDM2,SMAD2,YY1,SMARCB1,EP300,KAT2B,KMT2D,MEN1,PDX1
GO Process	GO:0065009	Regulation of molecular function	14	4913	0.54	8.84e-05	9606.ENSP00000212015,9606.ENSP00000250003,9606.ENSP00000254480,9606.ENSP00000258149,9606.ENSP00000262160,9606.ENSP00000262188,9606.ENSP00000262189,9606.ENSP00000262238,9606.ENSP00000263121,9606.ENSP00000263253,9606.ENSP00000263754,9606.ENSP00000301067,9606.ENSP00000337088,9606.ENSP00000370421	SIRT1,MYOD1,SMARCC1,MDM2,SMAD2,SMARCD3,KMT2C,YY1,SMARCB1,EP300,KAT2B,KMT2D,MEN1,PDX1
GO Process	GO:0009887	Animal organ morphogenesis	8	967	1.01	9.81e-05	9606.ENSP00000254480,9606.ENSP00000258149,9606.ENSP00000262160,9606.ENSP00000262188,9606.ENSP00000262238,9606.ENSP00000263253,9606.ENSP00000367203,9606.ENSP00000370421	SMARCC1,MDM2,SMAD2,SMARCD3,YY1,EP300,KDM6A,PDX1
GO Process	GO:0048513	Animal organ development	12	3197	0.66	0.0001	9606.ENSP00000212015,9606.ENSP00000250003,9606.ENSP00000254480,9606.ENSP00000258149,9606.ENSP00000262160,9606.ENSP00000262188,9606.ENSP00000262238,9606.ENSP00000263253,9606.ENSP00000263754,9606.ENSP00000337088,9606.ENSP00000367203,9606.ENSP00000370421	SIRT1,MYOD1,SMARCC1,MDM2,SMAD2,SMARCD3,YY1,EP300,KAT2B,MEN1,KDM6A,PDX1
GO Process	GO:0051239	Regulation of multicellular organismal process	12	3227	0.66	0.00011	9606.ENSP00000212015,9606.ENSP00000250003,9606.ENSP00000258149,9606.ENSP00000262160,9606.ENSP00000262188,9606.ENSP00000262189,9606.ENSP00000262238,9606.ENSP00000263253,9606.ENSP00000263754,9606.ENSP00000264515,9606.ENSP00000301067,9606.ENSP00000337088	SIRT1,MYOD1,MDM2,SMAD2,SMARCD3,KMT2C,YY1,EP300,KAT2B,RBBP5,KMT2D,MEN1
GO Process	GO:0043627	Response to estrogen	4	74	1.82	0.00012	9606.ENSP00000258149,9606.ENSP00000263253,9606.ENSP00000264515,9606.ENSP00000301067	MDM2,EP300,RBBP5,KMT2D
GO Process	GO:0051253	Negative regulation of rna metabolic process	9	1422	0.89	0.00012	9606.ENSP00000212015,9606.ENSP00000258149,9606.ENSP00000262160,9606.ENSP00000262238,9606.ENSP00000263253,9606.ENSP00000263754,9606.ENSP00000301067,9606.ENSP00000337088,9606.ENSP00000370421	SIRT1,MDM2,SMAD2,YY1,EP300,KAT2B,KMT2D,MEN1,PDX1
GO Process	GO:0031324	Negative regulation of cellular metabolic process	11	2630	0.71	0.00016	9606.ENSP00000212015,9606.ENSP00000254480,9606.ENSP00000258149,9606.ENSP00000262160,9606.ENSP00000262238,9606.ENSP00000263121,9606.ENSP00000263253,9606.ENSP00000263754,9606.ENSP00000301067,9606.ENSP00000337088,9606.ENSP00000370421	SIRT1,SMARCC1,MDM2,SMAD2,YY1,SMARCB1,EP300,KAT2B,KMT2D,MEN1,PDX1
GO Process	GO:0034644	Cellular response to uv	4	83	1.77	0.00017	9606.ENSP00000212015,9606.ENSP00000258149,9606.ENSP00000262238,9606.ENSP00000263253	SIRT1,MDM2,YY1,EP300
GO Process	GO:0006337	Nucleosome disassembly	3	19	2.29	0.00018	9606.ENSP00000254480,9606.ENSP00000262188,9606.ENSP00000263121	SMARCC1,SMARCD3,SMARCB1
GO Process	GO:0043933	Protein-containing complex subunit organization	9	1539	0.85	0.0002	9606.ENSP00000254480,9606.ENSP00000258149,9606.ENSP00000262160,9606.ENSP00000262188,9606.ENSP00000263121,9606.ENSP00000263253,9606.ENSP00000264515,9606.ENSP00000301067,9606.ENSP00000337088	SMARCC1,MDM2,SMAD2,SMARCD3,SMARCB1,EP300,RBBP5,KMT2D,MEN1
GO Process	GO:0051149	Positive regulation of muscle cell differentiation	4	88	1.74	0.0002	9606.ENSP00000212015,9606.ENSP00000250003,9606.ENSP00000258149,9606.ENSP00000262188	SIRT1,MYOD1,MDM2,SMARCD3
GO Process	GO:1901700	Response to oxygen-containing compound	9	1567	0.85	0.00022	9606.ENSP00000212015,9606.ENSP00000250003,9606.ENSP00000254480,9606.ENSP00000258149,9606.ENSP00000262160,9606.ENSP00000262238,9606.ENSP00000263754,9606.ENSP00000337088,9606.ENSP00000370421	SIRT1,MYOD1,SMARCC1,MDM2,SMAD2,YY1,KAT2B,MEN1,PDX1
GO Process	GO:0048856	Anatomical structure development	14	5402	0.5	0.00023	9606.ENSP00000212015,9606.ENSP00000250003,9606.ENSP00000254480,9606.ENSP00000258149,9606.ENSP00000262160,9606.ENSP00000262188,9606.ENSP00000262238,9606.ENSP00000263121,9606.ENSP00000263253,9606.ENSP00000263754,9606.ENSP00000301067,9606.ENSP00000337088,9606.ENSP00000367203,9606.ENSP00000370421	SIRT1,MYOD1,SMARCC1,MDM2,SMAD2,SMARCD3,YY1,SMARCB1,EP300,KAT2B,KMT2D,MEN1,KDM6A,PDX1
GO Process	GO:0048731	System development	13	4426	0.56	0.00026	9606.ENSP00000212015,9606.ENSP00000250003,9606.ENSP00000254480,9606.ENSP00000258149,9606.ENSP00000262160,9606.ENSP00000262188,9606.ENSP00000262238,9606.ENSP00000263121,9606.ENSP00000263253,9606.ENSP00000263754,9606.ENSP00000337088,9606.ENSP00000367203,9606.ENSP00000370421	SIRT1,MYOD1,SMARCC1,MDM2,SMAD2,SMARCD3,YY1,SMARCB1,EP300,KAT2B,MEN1,KDM6A,PDX1
GO Process	GO:0009653	Anatomical structure morphogenesis	10	2165	0.75	0.00027	9606.ENSP00000212015,9606.ENSP00000250003,9606.ENSP00000254480,9606.ENSP00000258149,9606.ENSP00000262160,9606.ENSP00000262188,9606.ENSP00000262238,9606.ENSP00000263253,9606.ENSP00000367203,9606.ENSP00000370421	SIRT1,MYOD1,SMARCC1,MDM2,SMAD2,SMARCD3,YY1,EP300,KDM6A,PDX1
GO Process	GO:0042127	Regulation of cell population proliferation	9	1642	0.83	0.00031	9606.ENSP00000212015,9606.ENSP00000250003,9606.ENSP00000258149,9606.ENSP00000262160,9606.ENSP00000262188,9606.ENSP00000263754,9606.ENSP00000301067,9606.ENSP00000337088,9606.ENSP00000370421	SIRT1,MYOD1,MDM2,SMAD2,SMARCD3,KAT2B,KMT2D,MEN1,PDX1
GO Process	GO:0006807	Nitrogen compound metabolic process	15	6852	0.43	0.00033	9606.ENSP00000212015,9606.ENSP00000250003,9606.ENSP00000258149,9606.ENSP00000262160,9606.ENSP00000262188,9606.ENSP00000262189,9606.ENSP00000262238,9606.ENSP00000263121,9606.ENSP00000263253,9606.ENSP00000263754,9606.ENSP00000264515,9606.ENSP00000301067,9606.ENSP00000337088,9606.ENSP00000367203,9606.ENSP00000370421	SIRT1,MYOD1,MDM2,SMAD2,SMARCD3,KMT2C,YY1,SMARCB1,EP300,KAT2B,RBBP5,KMT2D,MEN1,KDM6A,PDX1
GO Process	GO:0006974	Cellular response to dna damage stimulus	7	793	1.03	0.00033	9606.ENSP00000212015,9606.ENSP00000258149,9606.ENSP00000262238,9606.ENSP00000263121,9606.ENSP00000263253,9606.ENSP00000264515,9606.ENSP00000337088	SIRT1,MDM2,YY1,SMARCB1,EP300,RBBP5,MEN1
GO Process	GO:0010605	Negative regulation of macromolecule metabolic process	11	2875	0.67	0.00033	9606.ENSP00000212015,9606.ENSP00000254480,9606.ENSP00000258149,9606.ENSP00000262160,9606.ENSP00000262238,9606.ENSP00000263121,9606.ENSP00000263253,9606.ENSP00000263754,9606.ENSP00000301067,9606.ENSP00000337088,9606.ENSP00000370421	SIRT1,SMARCC1,MDM2,SMAD2,YY1,SMARCB1,EP300,KAT2B,KMT2D,MEN1,PDX1
GO Process	GO:0018394	Peptidyl-lysine acetylation	4	113	1.64	0.00042	9606.ENSP00000212015,9606.ENSP00000250003,9606.ENSP00000263253,9606.ENSP00000263754	SIRT1,MYOD1,EP300,KAT2B
GO Process	GO:0007507	Heart development	6	522	1.15	0.00047	9606.ENSP00000258149,9606.ENSP00000262160,9606.ENSP00000262188,9606.ENSP00000263253,9606.ENSP00000263754,9606.ENSP00000367203	MDM2,SMAD2,SMARCD3,EP300,KAT2B,KDM6A
GO Process	GO:0016579	Protein deubiquitination	5	281	1.34	0.00048	9606.ENSP00000258149,9606.ENSP00000262160,9606.ENSP00000262238,9606.ENSP00000263253,9606.ENSP00000263754	MDM2,SMAD2,YY1,EP300,KAT2B
GO Process	GO:0017015	Regulation of transforming growth factor beta receptor signaling pathway	4	119	1.61	0.00049	9606.ENSP00000212015,9606.ENSP00000262160,9606.ENSP00000263253,9606.ENSP00000337088	SIRT1,SMAD2,EP300,MEN1
GO Process	GO:0045892	Negative regulation of transcription, dna-templated	8	1273	0.89	0.0005	9606.ENSP00000212015,9606.ENSP00000258149,9606.ENSP00000262160,9606.ENSP00000262238,9606.ENSP00000263253,9606.ENSP00000301067,9606.ENSP00000337088,9606.ENSP00000370421	SIRT1,MDM2,SMAD2,YY1,EP300,KMT2D,MEN1,PDX1
GO Process	GO:0072359	Circulatory system development	7	872	0.99	0.00052	9606.ENSP00000212015,9606.ENSP00000258149,9606.ENSP00000262160,9606.ENSP00000262188,9606.ENSP00000263253,9606.ENSP00000263754,9606.ENSP00000367203	SIRT1,MDM2,SMAD2,SMARCD3,EP300,KAT2B,KDM6A
GO Process	GO:0000122	Negative regulation of transcription by rna polymerase ii	7	895	0.98	0.00061	9606.ENSP00000212015,9606.ENSP00000258149,9606.ENSP00000262160,9606.ENSP00000262238,9606.ENSP00000263253,9606.ENSP00000337088,9606.ENSP00000370421	SIRT1,MDM2,SMAD2,YY1,EP300,MEN1,PDX1
GO Process	GO:0032870	Cellular response to hormone stimulus	6	569	1.11	0.00065	9606.ENSP00000212015,9606.ENSP00000250003,9606.ENSP00000254480,9606.ENSP00000258149,9606.ENSP00000263754,9606.ENSP00000337088	SIRT1,MYOD1,SMARCC1,MDM2,KAT2B,MEN1
GO Process	GO:0044238	Primary metabolic process	15	7332	0.4	0.0007	9606.ENSP00000212015,9606.ENSP00000250003,9606.ENSP00000258149,9606.ENSP00000262160,9606.ENSP00000262188,9606.ENSP00000262189,9606.ENSP00000262238,9606.ENSP00000263121,9606.ENSP00000263253,9606.ENSP00000263754,9606.ENSP00000264515,9606.ENSP00000301067,9606.ENSP00000337088,9606.ENSP00000367203,9606.ENSP00000370421	SIRT1,MYOD1,MDM2,SMAD2,SMARCD3,KMT2C,YY1,SMARCB1,EP300,KAT2B,RBBP5,KMT2D,MEN1,KDM6A,PDX1
GO Process	GO:0003002	Regionalization	5	332	1.27	0.00088	9606.ENSP00000262160,9606.ENSP00000262188,9606.ENSP00000262238,9606.ENSP00000263253,9606.ENSP00000367203	SMAD2,SMARCD3,YY1,EP300,KDM6A
GO Process	GO:0018076	N-terminal peptidyl-lysine acetylation	2	3	2.91	0.00099	9606.ENSP00000263253,9606.ENSP00000263754	EP300,KAT2B
GO Process	GO:0006111	Regulation of gluconeogenesis	3	46	1.9	0.0012	9606.ENSP00000212015,9606.ENSP00000263253,9606.ENSP00000263754	SIRT1,EP300,KAT2B
GO Process	GO:0010629	Negative regulation of gene expression	9	2014	0.74	0.0012	9606.ENSP00000212015,9606.ENSP00000258149,9606.ENSP00000262160,9606.ENSP00000262238,9606.ENSP00000263253,9606.ENSP00000263754,9606.ENSP00000301067,9606.ENSP00000337088,9606.ENSP00000370421	SIRT1,MDM2,SMAD2,YY1,EP300,KAT2B,KMT2D,MEN1,PDX1
GO Process	GO:0051098	Regulation of binding	5	373	1.21	0.0014	9606.ENSP00000262160,9606.ENSP00000262188,9606.ENSP00000263253,9606.ENSP00000337088,9606.ENSP00000370421	SMAD2,SMARCD3,EP300,MEN1,PDX1
GO Process	GO:0031648	Protein destabilization	3	52	1.85	0.0016	9606.ENSP00000212015,9606.ENSP00000258149,9606.ENSP00000263253	SIRT1,MDM2,EP300
GO Process	GO:0043434	Response to peptide hormone	5	394	1.19	0.0017	9606.ENSP00000212015,9606.ENSP00000254480,9606.ENSP00000258149,9606.ENSP00000263754,9606.ENSP00000337088	SIRT1,SMARCC1,MDM2,KAT2B,MEN1
GO Process	GO:0048589	Developmental growth	5	389	1.2	0.0017	9606.ENSP00000250003,9606.ENSP00000262160,9606.ENSP00000263253,9606.ENSP00000301067,9606.ENSP00000367203	MYOD1,SMAD2,EP300,KMT2D,KDM6A
GO Process	GO:0090304	Nucleic acid metabolic process	9	2178	0.7	0.002	9606.ENSP00000212015,9606.ENSP00000262160,9606.ENSP00000262188,9606.ENSP00000262238,9606.ENSP00000263121,9606.ENSP00000263253,9606.ENSP00000263754,9606.ENSP00000337088,9606.ENSP00000370421	SIRT1,SMAD2,SMARCD3,YY1,SMARCB1,EP300,KAT2B,MEN1,PDX1
GO Process	GO:0006333	Chromatin assembly or disassembly	4	193	1.4	0.0022	9606.ENSP00000212015,9606.ENSP00000254480,9606.ENSP00000262188,9606.ENSP00000263121	SIRT1,SMARCC1,SMARCD3,SMARCB1
GO Process	GO:1900113	Negative regulation of histone h3-k9 trimethylation	2	6	2.61	0.0023	9606.ENSP00000212015,9606.ENSP00000263121	SIRT1,SMARCB1
GO Process	GO:0030154	Cell differentiation	11	3702	0.56	0.0025	9606.ENSP00000212015,9606.ENSP00000250003,9606.ENSP00000258149,9606.ENSP00000262160,9606.ENSP00000262188,9606.ENSP00000262238,9606.ENSP00000263253,9606.ENSP00000301067,9606.ENSP00000337088,9606.ENSP00000367203,9606.ENSP00000370421	SIRT1,MYOD1,MDM2,SMAD2,SMARCD3,YY1,EP300,KMT2D,MEN1,KDM6A,PDX1
GO Process	GO:0040029	Regulation of gene expression, epigenetic	4	202	1.38	0.0025	9606.ENSP00000212015,9606.ENSP00000263253,9606.ENSP00000263754,9606.ENSP00000301067	SIRT1,EP300,KAT2B,KMT2D
GO Process	GO:0071495	Cellular response to endogenous stimulus	7	1181	0.86	0.0027	9606.ENSP00000212015,9606.ENSP00000250003,9606.ENSP00000254480,9606.ENSP00000258149,9606.ENSP00000262160,9606.ENSP00000263754,9606.ENSP00000337088	SIRT1,MYOD1,SMARCC1,MDM2,SMAD2,KAT2B,MEN1
GO Process	GO:0009952	Anterior/posterior pattern specification	4	214	1.36	0.0031	9606.ENSP00000262160,9606.ENSP00000262238,9606.ENSP00000263253,9606.ENSP00000367203	SMAD2,YY1,EP300,KDM6A
GO Process	GO:0033554	Cellular response to stress	8	1725	0.75	0.0031	9606.ENSP00000212015,9606.ENSP00000250003,9606.ENSP00000258149,9606.ENSP00000262238,9606.ENSP00000263121,9606.ENSP00000263253,9606.ENSP00000264515,9606.ENSP00000337088	SIRT1,MYOD1,MDM2,YY1,SMARCB1,EP300,RBBP5,MEN1
GO Process	GO:0071453	Cellular response to oxygen levels	4	216	1.35	0.0032	9606.ENSP00000212015,9606.ENSP00000250003,9606.ENSP00000258149,9606.ENSP00000263253	SIRT1,MYOD1,MDM2,EP300
GO Process	GO:0032501	Multicellular organismal process	14	6933	0.39	0.0033	9606.ENSP00000212015,9606.ENSP00000250003,9606.ENSP00000254480,9606.ENSP00000258149,9606.ENSP00000262160,9606.ENSP00000262188,9606.ENSP00000262238,9606.ENSP00000263121,9606.ENSP00000263253,9606.ENSP00000263754,9606.ENSP00000301067,9606.ENSP00000337088,9606.ENSP00000367203,9606.ENSP00000370421	SIRT1,MYOD1,SMARCC1,MDM2,SMAD2,SMARCD3,YY1,SMARCB1,EP300,KAT2B,KMT2D,MEN1,KDM6A,PDX1
GO Process	GO:0097692	Histone h3-k4 monomethylation	2	8	2.49	0.0034	9606.ENSP00000262189,9606.ENSP00000301067	KMT2C,KMT2D
GO Process	GO:0071310	Cellular response to organic substance	9	2369	0.67	0.0035	9606.ENSP00000212015,9606.ENSP00000250003,9606.ENSP00000254480,9606.ENSP00000258149,9606.ENSP00000262160,9606.ENSP00000262238,9606.ENSP00000263253,9606.ENSP00000263754,9606.ENSP00000337088	SIRT1,MYOD1,SMARCC1,MDM2,SMAD2,YY1,EP300,KAT2B,MEN1
GO Process	GO:0031016	Pancreas development	3	73	1.7	0.0037	9606.ENSP00000262160,9606.ENSP00000337088,9606.ENSP00000370421	SMAD2,MEN1,PDX1
GO Process	GO:0033143	Regulation of intracellular steroid hormone receptor signaling pathway	3	76	1.68	0.0041	9606.ENSP00000212015,9606.ENSP00000263253,9606.ENSP00000301067	SIRT1,EP300,KMT2D
GO Process	GO:0010647	Positive regulation of cell communication	8	1823	0.73	0.0043	9606.ENSP00000212015,9606.ENSP00000262160,9606.ENSP00000263121,9606.ENSP00000263253,9606.ENSP00000263754,9606.ENSP00000301067,9606.ENSP00000337088,9606.ENSP00000370421	SIRT1,SMAD2,SMARCB1,EP300,KAT2B,KMT2D,MEN1,PDX1
GO Process	GO:0048523	Negative regulation of cellular process	12	4874	0.48	0.0043	9606.ENSP00000212015,9606.ENSP00000250003,9606.ENSP00000254480,9606.ENSP00000258149,9606.ENSP00000262160,9606.ENSP00000262238,9606.ENSP00000263121,9606.ENSP00000263253,9606.ENSP00000263754,9606.ENSP00000301067,9606.ENSP00000337088,9606.ENSP00000370421	SIRT1,MYOD1,SMARCC1,MDM2,SMAD2,YY1,SMARCB1,EP300,KAT2B,KMT2D,MEN1,PDX1
GO Process	GO:0023056	Positive regulation of signaling	8	1831	0.73	0.0044	9606.ENSP00000212015,9606.ENSP00000262160,9606.ENSP00000263121,9606.ENSP00000263253,9606.ENSP00000263754,9606.ENSP00000301067,9606.ENSP00000337088,9606.ENSP00000370421	SIRT1,SMAD2,SMARCB1,EP300,KAT2B,KMT2D,MEN1,PDX1
GO Process	GO:0065003	Protein-containing complex assembly	7	1293	0.82	0.0044	9606.ENSP00000258149,9606.ENSP00000262160,9606.ENSP00000263121,9606.ENSP00000263253,9606.ENSP00000264515,9606.ENSP00000301067,9606.ENSP00000337088	MDM2,SMAD2,SMARCB1,EP300,RBBP5,KMT2D,MEN1
GO Process	GO:0006281	DNA repair	5	522	1.07	0.0053	9606.ENSP00000212015,9606.ENSP00000262238,9606.ENSP00000263121,9606.ENSP00000263253,9606.ENSP00000337088	SIRT1,YY1,SMARCB1,EP300,MEN1
GO Process	GO:0048646	Anatomical structure formation involved in morphogenesis	6	883	0.92	0.0053	9606.ENSP00000212015,9606.ENSP00000250003,9606.ENSP00000262160,9606.ENSP00000262188,9606.ENSP00000263253,9606.ENSP00000367203	SIRT1,MYOD1,SMAD2,SMARCD3,EP300,KDM6A
GO Process	GO:0051152	Positive regulation of smooth muscle cell differentiation	2	11	2.35	0.0055	9606.ENSP00000212015,9606.ENSP00000262188	SIRT1,SMARCD3
GO Process	GO:0048583	Regulation of response to stimulus	11	4114	0.51	0.006	9606.ENSP00000212015,9606.ENSP00000250003,9606.ENSP00000258149,9606.ENSP00000262160,9606.ENSP00000262238,9606.ENSP00000263121,9606.ENSP00000263253,9606.ENSP00000263754,9606.ENSP00000301067,9606.ENSP00000337088,9606.ENSP00000370421	SIRT1,MYOD1,MDM2,SMAD2,YY1,SMARCB1,EP300,KAT2B,KMT2D,MEN1,PDX1
GO Process	GO:0071375	Cellular response to peptide hormone stimulus	4	269	1.26	0.0064	9606.ENSP00000254480,9606.ENSP00000258149,9606.ENSP00000263754,9606.ENSP00000337088	SMARCC1,MDM2,KAT2B,MEN1
GO Process	GO:0045722	Positive regulation of gluconeogenesis	2	14	2.24	0.0079	9606.ENSP00000212015,9606.ENSP00000263754	SIRT1,KAT2B
GO Process	GO:0090239	Regulation of histone h4 acetylation	2	14	2.24	0.0079	9606.ENSP00000212015,9606.ENSP00000263121	SIRT1,SMARCB1
GO Process	GO:2001243	Negative regulation of intrinsic apoptotic signaling pathway	3	99	1.57	0.0079	9606.ENSP00000212015,9606.ENSP00000258149,9606.ENSP00000370421	SIRT1,MDM2,PDX1
GO Process	GO:0043518	Negative regulation of dna damage response, signal transduction by p53 class mediator	2	15	2.21	0.0088	9606.ENSP00000212015,9606.ENSP00000258149	SIRT1,MDM2
GO Process	GO:0010243	Response to organonitrogen compound	6	987	0.87	0.009	9606.ENSP00000212015,9606.ENSP00000254480,9606.ENSP00000258149,9606.ENSP00000263754,9606.ENSP00000337088,9606.ENSP00000370421	SIRT1,SMARCC1,MDM2,KAT2B,MEN1,PDX1
GO Process	GO:0016573	Histone acetylation	3	105	1.54	0.009	9606.ENSP00000250003,9606.ENSP00000263253,9606.ENSP00000263754	MYOD1,EP300,KAT2B
GO Process	GO:0010467	Gene expression	8	2056	0.68	0.0091	9606.ENSP00000212015,9606.ENSP00000262160,9606.ENSP00000262188,9606.ENSP00000262238,9606.ENSP00000263121,9606.ENSP00000263253,9606.ENSP00000263754,9606.ENSP00000370421	SIRT1,SMAD2,SMARCD3,YY1,SMARCB1,EP300,KAT2B,PDX1
GO Process	GO:0045597	Positive regulation of cell differentiation	6	993	0.87	0.0091	9606.ENSP00000212015,9606.ENSP00000250003,9606.ENSP00000258149,9606.ENSP00000262160,9606.ENSP00000262188,9606.ENSP00000263253	SIRT1,MYOD1,MDM2,SMAD2,SMARCD3,EP300
GO Process	GO:0006950	Response to stress	10	3485	0.55	0.0092	9606.ENSP00000212015,9606.ENSP00000250003,9606.ENSP00000258149,9606.ENSP00000262160,9606.ENSP00000262238,9606.ENSP00000263121,9606.ENSP00000263253,9606.ENSP00000264515,9606.ENSP00000337088,9606.ENSP00000370421	SIRT1,MYOD1,MDM2,SMAD2,YY1,SMARCB1,EP300,RBBP5,MEN1,PDX1
GO Process	GO:0050794	Regulation of cellular process	16	10932	0.25	0.0092	9606.ENSP00000212015,9606.ENSP00000250003,9606.ENSP00000254480,9606.ENSP00000258149,9606.ENSP00000262160,9606.ENSP00000262188,9606.ENSP00000262189,9606.ENSP00000262238,9606.ENSP00000263121,9606.ENSP00000263253,9606.ENSP00000263754,9606.ENSP00000264515,9606.ENSP00000301067,9606.ENSP00000337088,9606.ENSP00000367203,9606.ENSP00000370421	SIRT1,MYOD1,SMARCC1,MDM2,SMAD2,SMARCD3,KMT2C,YY1,SMARCB1,EP300,KAT2B,RBBP5,KMT2D,MEN1,KDM6A,PDX1
GO Process	GO:0010225	Response to uv-c	2	16	2.18	0.0095	9606.ENSP00000258149,9606.ENSP00000262238	MDM2,YY1
GO Process	GO:0090100	Positive regulation of transmembrane receptor protein serine/threonine kinase signaling pathway	3	110	1.52	0.0098	9606.ENSP00000262160,9606.ENSP00000263253,9606.ENSP00000337088	SMAD2,EP300,MEN1
GO Process	GO:1902807	Negative regulation of cell cycle g1/s phase transition	3	110	1.52	0.0098	9606.ENSP00000258149,9606.ENSP00000263253,9606.ENSP00000337088	MDM2,EP300,MEN1
GO Process	GO:0070647	Protein modification by small protein conjugation or removal	6	1021	0.86	0.0101	9606.ENSP00000212015,9606.ENSP00000258149,9606.ENSP00000262160,9606.ENSP00000262238,9606.ENSP00000263253,9606.ENSP00000263754	SIRT1,MDM2,SMAD2,YY1,EP300,KAT2B
GO Process	GO:0043923	Positive regulation by host of viral transcription	2	17	2.16	0.0102	9606.ENSP00000263121,9606.ENSP00000263253	SMARCB1,EP300
GO Process	GO:0051716	Cellular response to stimulus	13	6489	0.39	0.0104	9606.ENSP00000212015,9606.ENSP00000250003,9606.ENSP00000254480,9606.ENSP00000258149,9606.ENSP00000262160,9606.ENSP00000262238,9606.ENSP00000263121,9606.ENSP00000263253,9606.ENSP00000263754,9606.ENSP00000264515,9606.ENSP00000337088,9606.ENSP00000367203,9606.ENSP00000370421	SIRT1,MYOD1,SMARCC1,MDM2,SMAD2,YY1,SMARCB1,EP300,KAT2B,RBBP5,MEN1,KDM6A,PDX1
GO Process	GO:0007221	Positive regulation of transcription of notch receptor target	2	18	2.13	0.011	9606.ENSP00000263253,9606.ENSP00000263754	EP300,KAT2B
GO Process	GO:0032269	Negative regulation of cellular protein metabolic process	6	1043	0.85	0.011	9606.ENSP00000212015,9606.ENSP00000254480,9606.ENSP00000258149,9606.ENSP00000263121,9606.ENSP00000263754,9606.ENSP00000337088	SIRT1,SMARCC1,MDM2,SMARCB1,KAT2B,MEN1
GO Process	GO:0010948	Negative regulation of cell cycle process	4	328	1.17	0.0115	9606.ENSP00000258149,9606.ENSP00000263253,9606.ENSP00000263754,9606.ENSP00000337088	MDM2,EP300,KAT2B,MEN1
GO Process	GO:1901701	Cellular response to oxygen-containing compound	6	1055	0.84	0.0115	9606.ENSP00000212015,9606.ENSP00000250003,9606.ENSP00000254480,9606.ENSP00000258149,9606.ENSP00000263754,9606.ENSP00000337088	SIRT1,MYOD1,SMARCC1,MDM2,KAT2B,MEN1
GO Process	GO:0035270	Endocrine system development	3	120	1.49	0.0116	9606.ENSP00000262160,9606.ENSP00000337088,9606.ENSP00000370421	SMAD2,MEN1,PDX1
GO Process	GO:0003309	Type b pancreatic cell differentiation	2	19	2.11	0.0117	9606.ENSP00000337088,9606.ENSP00000370421	MEN1,PDX1
GO Process	GO:0072331	Signal transduction by p53 class mediator	3	123	1.47	0.0122	9606.ENSP00000212015,9606.ENSP00000258149,9606.ENSP00000263253	SIRT1,MDM2,EP300
GO Process	GO:0061647	Histone h3-k9 modification	2	20	2.09	0.0126	9606.ENSP00000212015,9606.ENSP00000263754	SIRT1,KAT2B
GO Process	GO:0048584	Positive regulation of response to stimulus	8	2257	0.64	0.0149	9606.ENSP00000212015,9606.ENSP00000262160,9606.ENSP00000263121,9606.ENSP00000263253,9606.ENSP00000263754,9606.ENSP00000301067,9606.ENSP00000337088,9606.ENSP00000370421	SIRT1,SMAD2,SMARCB1,EP300,KAT2B,KMT2D,MEN1,PDX1
GO Process	GO:0009967	Positive regulation of signal transduction	7	1654	0.71	0.0154	9606.ENSP00000212015,9606.ENSP00000262160,9606.ENSP00000263121,9606.ENSP00000263253,9606.ENSP00000263754,9606.ENSP00000301067,9606.ENSP00000337088	SIRT1,SMAD2,SMARCB1,EP300,KAT2B,KMT2D,MEN1
GO Process	GO:0008285	Negative regulation of cell population proliferation	5	696	0.94	0.0155	9606.ENSP00000250003,9606.ENSP00000262160,9606.ENSP00000263754,9606.ENSP00000337088,9606.ENSP00000370421	MYOD1,SMAD2,KAT2B,MEN1,PDX1
GO Process	GO:0050896	Response to stimulus	14	8046	0.33	0.0155	9606.ENSP00000212015,9606.ENSP00000250003,9606.ENSP00000254480,9606.ENSP00000258149,9606.ENSP00000262160,9606.ENSP00000262238,9606.ENSP00000263121,9606.ENSP00000263253,9606.ENSP00000263754,9606.ENSP00000264515,9606.ENSP00000301067,9606.ENSP00000337088,9606.ENSP00000367203,9606.ENSP00000370421	SIRT1,MYOD1,SMARCC1,MDM2,SMAD2,YY1,SMARCB1,EP300,KAT2B,RBBP5,KMT2D,MEN1,KDM6A,PDX1
GO Process	GO:0071901	Negative regulation of protein serine/threonine kinase activity	3	136	1.43	0.0155	9606.ENSP00000212015,9606.ENSP00000263754,9606.ENSP00000337088	SIRT1,KAT2B,MEN1
GO Process	GO:0009749	Response to glucose	3	138	1.42	0.016	9606.ENSP00000262160,9606.ENSP00000337088,9606.ENSP00000370421	SMAD2,MEN1,PDX1
GO Process	GO:0009628	Response to abiotic stimulus	6	1147	0.81	0.0164	9606.ENSP00000212015,9606.ENSP00000250003,9606.ENSP00000258149,9606.ENSP00000262238,9606.ENSP00000263253,9606.ENSP00000337088	SIRT1,MYOD1,MDM2,YY1,EP300,MEN1
GO Process	GO:0032925	Regulation of activin receptor signaling pathway	2	24	2.01	0.0166	9606.ENSP00000262160,9606.ENSP00000337088	SMAD2,MEN1
GO Process	GO:0051129	Negative regulation of cellular component organization	5	713	0.93	0.0166	9606.ENSP00000212015,9606.ENSP00000258149,9606.ENSP00000263121,9606.ENSP00000263253,9606.ENSP00000263754	SIRT1,MDM2,SMARCB1,EP300,KAT2B
GO Process	GO:1902254	Negative regulation of intrinsic apoptotic signaling pathway by p53 class mediator	2	24	2.01	0.0166	9606.ENSP00000212015,9606.ENSP00000258149	SIRT1,MDM2
GO Process	GO:0060765	Regulation of androgen receptor signaling pathway	2	25	1.99	0.0175	9606.ENSP00000212015,9606.ENSP00000263253	SIRT1,EP300
GO Process	GO:0010212	Response to ionizing radiation	3	145	1.4	0.0176	9606.ENSP00000212015,9606.ENSP00000258149,9606.ENSP00000337088	SIRT1,MDM2,MEN1
GO Process	GO:0016458	Gene silencing	3	147	1.4	0.0182	9606.ENSP00000212015,9606.ENSP00000262160,9606.ENSP00000301067	SIRT1,SMAD2,KMT2D
GO Process	GO:0022607	Cellular component assembly	8	2359	0.62	0.0186	9606.ENSP00000212015,9606.ENSP00000258149,9606.ENSP00000262160,9606.ENSP00000263121,9606.ENSP00000263253,9606.ENSP00000264515,9606.ENSP00000301067,9606.ENSP00000337088	SIRT1,MDM2,SMAD2,SMARCB1,EP300,RBBP5,KMT2D,MEN1
GO Process	GO:0080135	Regulation of cellular response to stress	5	739	0.92	0.0189	9606.ENSP00000212015,9606.ENSP00000258149,9606.ENSP00000263253,9606.ENSP00000337088,9606.ENSP00000370421	SIRT1,MDM2,EP300,MEN1,PDX1
GO Process	GO:0007399	Nervous system development	8	2371	0.62	0.0191	9606.ENSP00000254480,9606.ENSP00000258149,9606.ENSP00000262188,9606.ENSP00000263121,9606.ENSP00000263253,9606.ENSP00000337088,9606.ENSP00000367203,9606.ENSP00000370421	SMARCC1,MDM2,SMARCD3,SMARCB1,EP300,MEN1,KDM6A,PDX1
GO Process	GO:0009966	Regulation of signal transduction	9	3107	0.55	0.0196	9606.ENSP00000212015,9606.ENSP00000258149,9606.ENSP00000262160,9606.ENSP00000263121,9606.ENSP00000263253,9606.ENSP00000263754,9606.ENSP00000301067,9606.ENSP00000337088,9606.ENSP00000370421	SIRT1,MDM2,SMAD2,SMARCB1,EP300,KAT2B,KMT2D,MEN1,PDX1
GO Process	GO:0009888	Tissue development	7	1760	0.69	0.0202	9606.ENSP00000250003,9606.ENSP00000258149,9606.ENSP00000262160,9606.ENSP00000263253,9606.ENSP00000337088,9606.ENSP00000367203,9606.ENSP00000370421	MYOD1,MDM2,SMAD2,EP300,MEN1,KDM6A,PDX1
GO Process	GO:0071559	Response to transforming growth factor beta	3	156	1.37	0.0206	9606.ENSP00000212015,9606.ENSP00000262160,9606.ENSP00000337088	SIRT1,SMAD2,MEN1
GO Process	GO:0010564	Regulation of cell cycle process	5	760	0.91	0.0207	9606.ENSP00000258149,9606.ENSP00000262188,9606.ENSP00000263253,9606.ENSP00000263754,9606.ENSP00000337088	MDM2,SMARCD3,EP300,KAT2B,MEN1
GO Process	GO:0030511	Positive regulation of transforming growth factor beta receptor signaling pathway	2	29	1.93	0.0216	9606.ENSP00000263253,9606.ENSP00000337088	EP300,MEN1
GO Process	GO:0045736	Negative regulation of cyclin-dependent protein serine/threonine kinase activity	2	29	1.93	0.0216	9606.ENSP00000263754,9606.ENSP00000337088	KAT2B,MEN1
GO Process	GO:0051726	Regulation of cell cycle	6	1230	0.78	0.0216	9606.ENSP00000212015,9606.ENSP00000258149,9606.ENSP00000262188,9606.ENSP00000263253,9606.ENSP00000263754,9606.ENSP00000337088	SIRT1,MDM2,SMARCD3,EP300,KAT2B,MEN1
GO Process	GO:0016032	Viral process	5	776	0.9	0.0223	9606.ENSP00000212015,9606.ENSP00000258149,9606.ENSP00000263121,9606.ENSP00000263253,9606.ENSP00000263754	SIRT1,MDM2,SMARCB1,EP300,KAT2B
GO Process	GO:0042771	Intrinsic apoptotic signaling pathway in response to dna damage by p53 class mediator	2	30	1.91	0.0225	9606.ENSP00000212015,9606.ENSP00000263253	SIRT1,EP300
GO Process	GO:0006508	Proteolysis	6	1256	0.77	0.0234	9606.ENSP00000212015,9606.ENSP00000258149,9606.ENSP00000262160,9606.ENSP00000262238,9606.ENSP00000263253,9606.ENSP00000263754	SIRT1,MDM2,SMAD2,YY1,EP300,KAT2B
GO Process	GO:0010039	Response to iron ion	2	33	1.87	0.0263	9606.ENSP00000258149,9606.ENSP00000370421	MDM2,PDX1
GO Process	GO:1902235	Regulation of endoplasmic reticulum stress-induced intrinsic apoptotic signaling pathway	2	33	1.87	0.0263	9606.ENSP00000212015,9606.ENSP00000370421	SIRT1,PDX1
GO Process	GO:0051090	Regulation of dna-binding transcription factor activity	4	437	1.05	0.0265	9606.ENSP00000212015,9606.ENSP00000263121,9606.ENSP00000263253,9606.ENSP00000337088	SIRT1,SMARCB1,EP300,MEN1
GO Process	GO:0051099	Positive regulation of binding	3	175	1.32	0.0268	9606.ENSP00000263253,9606.ENSP00000337088,9606.ENSP00000370421	EP300,MEN1,PDX1
GO Process	GO:0031667	Response to nutrient levels	4	449	1.04	0.0284	9606.ENSP00000212015,9606.ENSP00000250003,9606.ENSP00000258149,9606.ENSP00000370421	SIRT1,MYOD1,MDM2,PDX1
GO Process	GO:1901796	Regulation of signal transduction by p53 class mediator	3	182	1.3	0.029	9606.ENSP00000212015,9606.ENSP00000258149,9606.ENSP00000263253	SIRT1,MDM2,EP300
GO Process	GO:1901987	Regulation of cell cycle phase transition	4	452	1.03	0.029	9606.ENSP00000258149,9606.ENSP00000262188,9606.ENSP00000263253,9606.ENSP00000337088	MDM2,SMARCD3,EP300,MEN1
GO Process	GO:0035295	Tube development	5	851	0.86	0.0312	9606.ENSP00000212015,9606.ENSP00000262160,9606.ENSP00000263253,9606.ENSP00000367203,9606.ENSP00000370421	SIRT1,SMAD2,EP300,KDM6A,PDX1
GO Process	GO:0042593	Glucose homeostasis	3	188	1.29	0.0315	9606.ENSP00000212015,9606.ENSP00000337088,9606.ENSP00000370421	SIRT1,MEN1,PDX1
GO Process	GO:0033993	Response to lipid	5	858	0.85	0.0319	9606.ENSP00000250003,9606.ENSP00000258149,9606.ENSP00000262160,9606.ENSP00000262238,9606.ENSP00000370421	MYOD1,MDM2,SMAD2,YY1,PDX1
GO Process	GO:0071456	Cellular response to hypoxia	3	189	1.29	0.0319	9606.ENSP00000212015,9606.ENSP00000258149,9606.ENSP00000263253	SIRT1,MDM2,EP300
GO Process	GO:0000578	Embryonic axis specification	2	39	1.8	0.0333	9606.ENSP00000262160,9606.ENSP00000367203	SMAD2,KDM6A
GO Process	GO:0061061	Muscle structure development	4	479	1.01	0.0343	9606.ENSP00000212015,9606.ENSP00000250003,9606.ENSP00000262188,9606.ENSP00000263253	SIRT1,MYOD1,SMARCD3,EP300
GO Process	GO:0030073	Insulin secretion	2	40	1.79	0.0344	9606.ENSP00000262160,9606.ENSP00000370421	SMAD2,PDX1
GO Process	GO:0031669	Cellular response to nutrient levels	3	204	1.25	0.0375	9606.ENSP00000212015,9606.ENSP00000250003,9606.ENSP00000258149	SIRT1,MYOD1,MDM2
GO Process	GO:0008284	Positive regulation of cell population proliferation	5	919	0.82	0.0413	9606.ENSP00000212015,9606.ENSP00000258149,9606.ENSP00000262188,9606.ENSP00000301067,9606.ENSP00000370421	SIRT1,MDM2,SMARCD3,KMT2D,PDX1
GO Process	GO:0043393	Regulation of protein binding	3	212	1.24	0.0413	9606.ENSP00000262188,9606.ENSP00000263253,9606.ENSP00000337088	SMARCD3,EP300,MEN1
GO Process	GO:0043966	Histone h3 acetylation	2	45	1.74	0.0413	9606.ENSP00000250003,9606.ENSP00000263754	MYOD1,KAT2B
GO Process	GO:1902532	Negative regulation of intracellular signal transduction	4	508	0.98	0.0413	9606.ENSP00000212015,9606.ENSP00000258149,9606.ENSP00000337088,9606.ENSP00000370421	SIRT1,MDM2,MEN1,PDX1
GO Process	GO:0070848	Response to growth factor	4	524	0.97	0.0453	9606.ENSP00000212015,9606.ENSP00000258149,9606.ENSP00000262160,9606.ENSP00000337088	SIRT1,MDM2,SMAD2,MEN1
GO Process	GO:0003006	Developmental process involved in reproduction	5	945	0.81	0.0456	9606.ENSP00000212015,9606.ENSP00000254480,9606.ENSP00000262238,9606.ENSP00000301067,9606.ENSP00000337088	SIRT1,SMARCC1,YY1,KMT2D,MEN1
GO Process	GO:0060284	Regulation of cell development	5	956	0.81	0.0477	9606.ENSP00000250003,9606.ENSP00000258149,9606.ENSP00000262188,9606.ENSP00000262238,9606.ENSP00000263253	MYOD1,MDM2,SMARCD3,YY1,EP300
GO Process	GO:0072132	Mesenchyme morphogenesis	2	49	1.7	0.0477	9606.ENSP00000258149,9606.ENSP00000262160	MDM2,SMAD2
GO Process	GO:0045747	Positive regulation of notch signaling pathway	2	50	1.69	0.0493	9606.ENSP00000263253,9606.ENSP00000263754	EP300,KAT2B
GO Function	GO:0003713	Transcription coactivator activity	10	316	1.59	5.46e-11	9606.ENSP00000212015,9606.ENSP00000250003,9606.ENSP00000254480,9606.ENSP00000262188,9606.ENSP00000262189,9606.ENSP00000262238,9606.ENSP00000263121,9606.ENSP00000263253,9606.ENSP00000263754,9606.ENSP00000301067	SIRT1,MYOD1,SMARCC1,SMARCD3,KMT2C,YY1,SMARCB1,EP300,KAT2B,KMT2D
GO Function	GO:0000976	Transcription regulatory region sequence-specific dna binding	12	1028	1.15	1.85e-09	9606.ENSP00000212015,9606.ENSP00000250003,9606.ENSP00000262160,9606.ENSP00000262238,9606.ENSP00000263121,9606.ENSP00000263253,9606.ENSP00000263754,9606.ENSP00000264515,9606.ENSP00000301067,9606.ENSP00000337088,9606.ENSP00000367203,9606.ENSP00000370421	SIRT1,MYOD1,SMAD2,YY1,SMARCB1,EP300,KAT2B,RBBP5,KMT2D,MEN1,KDM6A,PDX1
GO Function	GO:0003677	DNA binding	14	2470	0.84	1.65e-08	9606.ENSP00000212015,9606.ENSP00000250003,9606.ENSP00000254480,9606.ENSP00000262160,9606.ENSP00000262189,9606.ENSP00000262238,9606.ENSP00000263121,9606.ENSP00000263253,9606.ENSP00000263754,9606.ENSP00000264515,9606.ENSP00000301067,9606.ENSP00000337088,9606.ENSP00000367203,9606.ENSP00000370421	SIRT1,MYOD1,SMARCC1,SMAD2,KMT2C,YY1,SMARCB1,EP300,KAT2B,RBBP5,KMT2D,MEN1,KDM6A,PDX1
GO Function	GO:0003682	Chromatin binding	9	570	1.29	8.97e-08	9606.ENSP00000250003,9606.ENSP00000254480,9606.ENSP00000262160,9606.ENSP00000262188,9606.ENSP00000263253,9606.ENSP00000263754,9606.ENSP00000337088,9606.ENSP00000367203,9606.ENSP00000370421	MYOD1,SMARCC1,SMAD2,SMARCD3,EP300,KAT2B,MEN1,KDM6A,PDX1
GO Function	GO:0140110	Transcription regulator activity	12	1657	0.95	9.73e-08	9606.ENSP00000212015,9606.ENSP00000250003,9606.ENSP00000254480,9606.ENSP00000262160,9606.ENSP00000262188,9606.ENSP00000262189,9606.ENSP00000262238,9606.ENSP00000263121,9606.ENSP00000263253,9606.ENSP00000263754,9606.ENSP00000301067,9606.ENSP00000370421	SIRT1,MYOD1,SMARCC1,SMAD2,SMARCD3,KMT2C,YY1,SMARCB1,EP300,KAT2B,KMT2D,PDX1
GO Function	GO:0003676	Nucleic acid binding	15	3947	0.67	2.35e-07	9606.ENSP00000212015,9606.ENSP00000250003,9606.ENSP00000254480,9606.ENSP00000258149,9606.ENSP00000262160,9606.ENSP00000262189,9606.ENSP00000262238,9606.ENSP00000263121,9606.ENSP00000263253,9606.ENSP00000263754,9606.ENSP00000264515,9606.ENSP00000301067,9606.ENSP00000337088,9606.ENSP00000367203,9606.ENSP00000370421	SIRT1,MYOD1,SMARCC1,MDM2,SMAD2,KMT2C,YY1,SMARCB1,EP300,KAT2B,RBBP5,KMT2D,MEN1,KDM6A,PDX1
GO Function	GO:0008134	Transcription factor binding	8	672	1.16	8.89e-06	9606.ENSP00000212015,9606.ENSP00000250003,9606.ENSP00000262160,9606.ENSP00000262188,9606.ENSP00000263121,9606.ENSP00000263253,9606.ENSP00000263754,9606.ENSP00000370421	SIRT1,MYOD1,SMAD2,SMARCD3,SMARCB1,EP300,KAT2B,PDX1
GO Function	GO:0005515	Protein binding	16	7026	0.44	3.11e-05	9606.ENSP00000212015,9606.ENSP00000250003,9606.ENSP00000254480,9606.ENSP00000258149,9606.ENSP00000262160,9606.ENSP00000262188,9606.ENSP00000262189,9606.ENSP00000262238,9606.ENSP00000263121,9606.ENSP00000263253,9606.ENSP00000263754,9606.ENSP00000264515,9606.ENSP00000301067,9606.ENSP00000337088,9606.ENSP00000367203,9606.ENSP00000370421	SIRT1,MYOD1,SMARCC1,MDM2,SMAD2,SMARCD3,KMT2C,YY1,SMARCB1,EP300,KAT2B,RBBP5,KMT2D,MEN1,KDM6A,PDX1
GO Function	GO:0000977	RNA polymerase II transcription regulatory region sequence-specific DNA binding	8	878	1.05	5.67e-05	9606.ENSP00000212015,9606.ENSP00000250003,9606.ENSP00000262160,9606.ENSP00000262238,9606.ENSP00000263253,9606.ENSP00000263754,9606.ENSP00000367203,9606.ENSP00000370421	SIRT1,MYOD1,SMAD2,YY1,EP300,KAT2B,KDM6A,PDX1
GO Function	GO:0002039	p53 binding	4	69	1.85	9.46e-05	9606.ENSP00000212015,9606.ENSP00000258149,9606.ENSP00000263121,9606.ENSP00000263253	SIRT1,MDM2,SMARCB1,EP300
GO Function	GO:0140297	DNA-binding transcription factor binding	6	366	1.3	9.46e-05	9606.ENSP00000212015,9606.ENSP00000250003,9606.ENSP00000262160,9606.ENSP00000262188,9606.ENSP00000263121,9606.ENSP00000263253	SIRT1,MYOD1,SMAD2,SMARCD3,SMARCB1,EP300
GO Function	GO:0000978	RNA polymerase II cis-regulatory region sequence-specific DNA binding	7	672	1.11	0.00014	9606.ENSP00000212015,9606.ENSP00000250003,9606.ENSP00000262160,9606.ENSP00000262238,9606.ENSP00000263253,9606.ENSP00000367203,9606.ENSP00000370421	SIRT1,MYOD1,SMAD2,YY1,EP300,KDM6A,PDX1
GO Function	GO:0042393	Histone binding	5	221	1.44	0.00019	9606.ENSP00000212015,9606.ENSP00000254480,9606.ENSP00000262189,9606.ENSP00000264515,9606.ENSP00000301067	SIRT1,SMARCC1,KMT2C,RBBP5,KMT2D
GO Function	GO:0061629	RNA polymerase II-specific DNA-binding transcription factor binding	5	283	1.33	0.00058	9606.ENSP00000212015,9606.ENSP00000250003,9606.ENSP00000262188,9606.ENSP00000263121,9606.ENSP00000263253	SIRT1,MYOD1,SMARCD3,SMARCB1,EP300
GO Function	GO:0035257	Nuclear hormone receptor binding	4	155	1.5	0.0015	9606.ENSP00000212015,9606.ENSP00000250003,9606.ENSP00000262188,9606.ENSP00000263253	SIRT1,MYOD1,SMARCD3,EP300
GO Function	GO:0004468	Lysine n-acetyltransferase activity, acting on acetyl phosphate as donor	2	5	2.69	0.0027	9606.ENSP00000263253,9606.ENSP00000263754	EP300,KAT2B
GO Function	GO:0046332	SMAD binding	3	75	1.69	0.0063	9606.ENSP00000262160,9606.ENSP00000262238,9606.ENSP00000337088	SMAD2,YY1,MEN1
GO Function	GO:0031490	Chromatin dna binding	3	79	1.67	0.0071	9606.ENSP00000250003,9606.ENSP00000263253,9606.ENSP00000367203	MYOD1,EP300,KDM6A
GO Function	GO:0000400	Four-way junction dna binding	2	10	2.39	0.0074	9606.ENSP00000262238,9606.ENSP00000337088	YY1,MEN1
GO Function	GO:0042800	Histone methyltransferase activity (h3-k4 specific)	2	10	2.39	0.0074	9606.ENSP00000262189,9606.ENSP00000301067	KMT2C,KMT2D
GO Function	GO:0047485	Protein n-terminus binding	3	110	1.52	0.0167	9606.ENSP00000254480,9606.ENSP00000258149,9606.ENSP00000337088	SMARCC1,MDM2,MEN1
GO Function	GO:0070412	R-SMAD binding	2	23	2.03	0.0303	9606.ENSP00000262160,9606.ENSP00000337088	SMAD2,MEN1
GO Component	GO:0005654	Nucleoplasm	16	3973	0.69	2.11e-08	9606.ENSP00000212015,9606.ENSP00000250003,9606.ENSP00000254480,9606.ENSP00000258149,9606.ENSP00000262160,9606.ENSP00000262188,9606.ENSP00000262189,9606.ENSP00000262238,9606.ENSP00000263121,9606.ENSP00000263253,9606.ENSP00000263754,9606.ENSP00000264515,9606.ENSP00000301067,9606.ENSP00000337088,9606.ENSP00000367203,9606.ENSP00000370421	SIRT1,MYOD1,SMARCC1,MDM2,SMAD2,SMARCD3,KMT2C,YY1,SMARCB1,EP300,KAT2B,RBBP5,KMT2D,MEN1,KDM6A,PDX1
GO Component	GO:0005694	Chromosome	12	1712	0.93	2.23e-07	9606.ENSP00000212015,9606.ENSP00000250003,9606.ENSP00000254480,9606.ENSP00000262160,9606.ENSP00000262188,9606.ENSP00000262238,9606.ENSP00000263121,9606.ENSP00000263253,9606.ENSP00000263754,9606.ENSP00000337088,9606.ENSP00000367203,9606.ENSP00000370421	SIRT1,MYOD1,SMARCC1,SMAD2,SMARCD3,YY1,SMARCB1,EP300,KAT2B,MEN1,KDM6A,PDX1
GO Component	GO:1902494	Catalytic complex	11	1328	1.01	2.86e-07	9606.ENSP00000254480,9606.ENSP00000262188,9606.ENSP00000262189,9606.ENSP00000262238,9606.ENSP00000263121,9606.ENSP00000263253,9606.ENSP00000263754,9606.ENSP00000264515,9606.ENSP00000301067,9606.ENSP00000337088,9606.ENSP00000367203	SMARCC1,SMARCD3,KMT2C,YY1,SMARCB1,EP300,KAT2B,RBBP5,KMT2D,MEN1,KDM6A
GO Component	GO:0044666	MLL3/4 complex	4	13	2.58	3.45e-07	9606.ENSP00000262189,9606.ENSP00000264515,9606.ENSP00000301067,9606.ENSP00000367203	KMT2C,RBBP5,KMT2D,KDM6A
GO Component	GO:0000790	Nuclear chromatin	10	1048	1.07	4.95e-07	9606.ENSP00000212015,9606.ENSP00000250003,9606.ENSP00000254480,9606.ENSP00000262160,9606.ENSP00000262188,9606.ENSP00000262238,9606.ENSP00000263121,9606.ENSP00000337088,9606.ENSP00000367203,9606.ENSP00000370421	SIRT1,MYOD1,SMARCC1,SMAD2,SMARCD3,YY1,SMARCB1,MEN1,KDM6A,PDX1
GO Component	GO:0035097	Histone methyltransferase complex	5	74	1.92	1.39e-06	9606.ENSP00000262189,9606.ENSP00000264515,9606.ENSP00000301067,9606.ENSP00000337088,9606.ENSP00000367203	KMT2C,RBBP5,KMT2D,MEN1,KDM6A
GO Component	GO:0032991	Protein-containing complex	15	5073	0.56	3.49e-06	9606.ENSP00000212015,9606.ENSP00000250003,9606.ENSP00000254480,9606.ENSP00000258149,9606.ENSP00000262160,9606.ENSP00000262188,9606.ENSP00000262189,9606.ENSP00000262238,9606.ENSP00000263121,9606.ENSP00000263253,9606.ENSP00000263754,9606.ENSP00000264515,9606.ENSP00000301067,9606.ENSP00000337088,9606.ENSP00000367203	SIRT1,MYOD1,SMARCC1,MDM2,SMAD2,SMARCD3,KMT2C,YY1,SMARCB1,EP300,KAT2B,RBBP5,KMT2D,MEN1,KDM6A
GO Component	GO:0071564	npBAF complex	3	12	2.49	3.11e-05	9606.ENSP00000254480,9606.ENSP00000262188,9606.ENSP00000263121	SMARCC1,SMARCD3,SMARCB1
GO Component	GO:0043232	Intracellular non-membrane-bounded organelle	14	4880	0.55	3.74e-05	9606.ENSP00000212015,9606.ENSP00000250003,9606.ENSP00000254480,9606.ENSP00000258149,9606.ENSP00000262160,9606.ENSP00000262188,9606.ENSP00000262238,9606.ENSP00000263121,9606.ENSP00000263253,9606.ENSP00000263754,9606.ENSP00000264515,9606.ENSP00000337088,9606.ENSP00000367203,9606.ENSP00000370421	SIRT1,MYOD1,SMARCC1,MDM2,SMAD2,SMARCD3,YY1,SMARCB1,EP300,KAT2B,RBBP5,MEN1,KDM6A,PDX1
GO Component	GO:0071565	nBAF complex	3	15	2.39	4.69e-05	9606.ENSP00000254480,9606.ENSP00000262188,9606.ENSP00000263121	SMARCC1,SMARCD3,SMARCB1
GO Component	GO:0070603	SWI/SNF superfamily-type complex	4	78	1.8	6.15e-05	9606.ENSP00000254480,9606.ENSP00000262188,9606.ENSP00000262238,9606.ENSP00000263121	SMARCC1,SMARCD3,YY1,SMARCB1
GO Component	GO:0016514	SWI/SNF complex	3	21	2.24	0.0001	9606.ENSP00000254480,9606.ENSP00000262188,9606.ENSP00000263121	SMARCC1,SMARCD3,SMARCB1
GO Component	GO:1990234	Transferase complex	7	752	1.06	0.00012	9606.ENSP00000262189,9606.ENSP00000263253,9606.ENSP00000263754,9606.ENSP00000264515,9606.ENSP00000301067,9606.ENSP00000337088,9606.ENSP00000367203	KMT2C,EP300,KAT2B,RBBP5,KMT2D,MEN1,KDM6A
GO Component	GO:0005667	Transcription regulator complex	4	431	1.05	0.0348	9606.ENSP00000250003,9606.ENSP00000262160,9606.ENSP00000262238,9606.ENSP00000263253	MYOD1,SMAD2,YY1,EP300
STRING clusters	CL:4001	MLL3/4 complex, and histone H3-K4 dimethylation	5	17	2.56	2.36e-05	9606.ENSP00000262189,9606.ENSP00000264515,9606.ENSP00000301067,9606.ENSP00000337088,9606.ENSP00000367203	KMT2C,RBBP5,KMT2D,MEN1,KDM6A
STRING clusters	CL:4023	Kabuki syndrome, and KMT2C, ePHD2	3	5	2.87	0.0413	9606.ENSP00000262189,9606.ENSP00000301067,9606.ENSP00000367203	KMT2C,KMT2D,KDM6A
